1 **Title:** Outer membrane lipid homeostasis via retrograde phospholipid transport in *Escherichia*

2 *coli*

3

4 **Authors:** Rahul Shrivastava<sup>a</sup>, Xiang'Er Jiang<sup>b</sup>, Shu-Sin Chng<sup>a,b\*</sup>

5

6 **Affiliations:**

7 <sup>a</sup>Department of Chemistry, National University of Singapore, Singapore 117543.

8 <sup>b</sup>Singapore Center for Environmental Life Sciences Engineering, National University of  
9 Singapore (SCELSE-NUS), Singapore 117456.

10

11 \*To whom correspondence should be addressed. E-mail: [chmchngs@nus.edu.sg](mailto:chmchngs@nus.edu.sg)

12

13 The authors declare no conflict of interest.

14 **Abstract**

15

16       The outer membrane (OM) is essential for viability in Gram-negative bacteria, yet  
17 mechanisms to ensure its stability and homeostasis are not understood. The trans-envelope Tol-  
18 Pal complex, whose physiological role has remained elusive, is important for OM stability. Here,  
19 we establish that the Tol-Pal complex is required for PL transport and OM lipid homeostasis in  
20 *Escherichia coli*. Cells lacking the complex exhibit defects in lipid asymmetry and accumulate  
21 excess phospholipids (PLs) in the OM. This imbalance in OM lipids is due to defective  
22 retrograde PL transport in the absence of a functional Tol-Pal complex. Thus, cells ensure the  
23 assembly of a stable OM by maintaining an excess flux of PLs to the OM only to return the  
24 surplus to the inner membrane. Our findings also provide insights into the mechanism by which  
25 the Tol-Pal complex may promote OM invagination during cell division.

26

27 **Keywords**

28 outer membrane stability; membrane homeostasis; lipid trafficking; membrane lipid asymmetry;  
29 membrane contact sites; TolQRA

30

## 31 **Introduction**

32

33 Lipid bilayers define cellular compartments, and thus life itself, yet our understanding of  
34 the assembly and maintenance of these structures are limited. In Gram-negative bacteria, the  
35 outer membrane (OM) is essential for growth, and allows the formation of an oxidizing  
36 periplasmic compartment beyond the cytoplasmic or inner membrane (IM) (Nikaido, 2003). The  
37 OM is asymmetric, with lipopolysaccharides (LPS) and phospholipids (PLs) found in the outer  
38 and inner leaflets, respectively. This unique lipid asymmetry is required for the OM to function  
39 as an effective and selective permeability barrier against toxic substances, rendering Gram-  
40 negative bacteria intrinsically resistant to many antibiotics, and allowing survival under adverse  
41 conditions. The assembly pathways of various OM components, including LPS (Okuda et al.,  
42 2016),  $\beta$ -barrel OM proteins (OMPs) (Hagan et al., 2011), and lipoproteins (Okuda and Tokuda,  
43 2011), have been well-characterized; however, processes by which PLs are assembled into the  
44 OM have not been discovered. Even though they are the most basic building blocks of any lipid  
45 bilayer, essentially nothing is known about how PLs are transported between the IM and the OM.  
46 Unlike other OM components, PL movement between the two membranes is bidirectional  
47 (Donohue-Rolfe and Schaechter, 1980; Jones and Osborn, 1977; Langley et al., 1982). While  
48 anterograde (IM-to-OM) transport is essential for OM biogenesis, the role for retrograde (OM-  
49 to-IM) PL transport is unclear. How assembly of the various OM components are coordinated to  
50 ensure homeostasis and stability of the OM is also unknown.

51 The Tol-Pal complex is a trans-envelope system highly conserved in Gram-negative  
52 bacteria (Lloubes et al., 2001; Sturgis, 2001). It comprises five proteins organized in two sub-  
53 complexes, TolQRA in the IM and TolB-Pal at the OM. In *Escherichia coli*, these sub-  
54 complexes interact in a proton motive force (pmf)-dependent fashion, with TolQR transducing

55 energy to control conformational changes in TolA and allowing it to reach across the periplasm  
56 to contact Pal (Cascales et al., 2000; Germon et al., 2001), an OM lipoprotein that binds  
57 peptidoglycan (Godlewska et al., 2009). TolA also interacts with periplasmic TolB (Walburger et  
58 al., 2002), whose function within the complex is not clear. The TolQRA sub-complex is  
59 analogous to the ExbBD-TonB system (Lloubes et al., 2001; Cascales et al., 2001; Witty et al.,  
60 2002), where energy-dependent conformational changes in TonB are exploited for the transport  
61 of metal-siderophores across the OM (Gresock et al., 2015). Unlike the ExbBD-TonB system,  
62 however, the physiological role of the Tol-Pal complex has not been elucidated, despite being  
63 discovered over four decades ago (Bernstein et al., 1972; Lazzaroni and Portalier, 1981). The  
64 Tol-Pal complex has been shown to be important for OM invagination during cell division  
65 (Gerding et al., 2007), but mutations in the *tol-pal* genes also result in a variety of phenotypes,  
66 such as hypersensitivity to detergents and antibiotics, leakage of periplasmic proteins, and  
67 prolific shedding of OM vesicles, all indicative of an unstable OM (Lloubes et al., 2001). In  
68 addition, removing the *tol-pal* genes causes envelope stress and up-regulation of the  $\sigma^E$  and Rcs  
69 phosphorelay responses (Vines et al., 2005; Clavel et al., 1996). It has thus been suggested that  
70 the Tol-Pal complex may in fact be important for OM stability and biogenesis. Interestingly, the  
71 *tol-pal* genes are often found in the same operon as *ybgC* (Sturgis, 2001), which encodes an acyl  
72 thioesterase shown to interact with PL biosynthetic enzymes in *E. coli* (Gully and Bouveret,  
73 2006). This association suggests that the Tol-Pal complex may play a role in PL metabolism  
74 and/or transport.

75 Here, we report that the Tol-Pal complex is required for retrograde PL transport and OM  
76 lipid homeostasis in *E. coli*. We show that cells lacking the Tol-Pal complex exhibit defects in  
77 OM lipid asymmetry, as judged by the presence of outer leaflet PLs. We further demonstrate that  
78 *tol-pal* mutants accumulate excess PLs (relative to LPS) in the OM, indicating lipid imbalance in

79 the membrane. Finally, using OM PL turnover as readout, we establish that the Tol-Pal complex  
80 is functionally important for efficient transport of PLs from the OM back to the IM. Our work  
81 solves a longstanding question on the physiological role of the Tol-Pal complex, and provides  
82 novel mechanistic insights into lipid homeostasis in the OM.

83

## 84 **Results**

85

### 86 **Cells lacking the Tol-Pal complex exhibit defects in OM lipid asymmetry**

87 To elucidate the function of the Tol-Pal complex, we set out to characterize the molecular  
88 nature of OM defects observed in *tol-pal* mutants in *E. coli*. Defects in the assembly of OM  
89 components typically lead to perturbations in OM lipid asymmetry (Wu et al., 2006; Ruiz et al.,  
90 2008). This is characterized by the accumulation of PLs in the outer leaflet of the OM, which  
91 serve as substrates for PagP-mediated acylation of LPS (lipid A) (Bishop, 2005). To determine if  
92 *tol-pal* mutants exhibit defects in OM lipid asymmetry, we analyzed lipid A acylation in strains  
93 lacking any member of the Tol-Pal complex. We demonstrated that each of the mutants  
94 accumulate more hepta-acylated lipid A in the OM compared to wild-type (WT) cells (Figure 1).  
95 This OM defect, and the resulting SDS/EDTA sensitivity in these *tol-pal* mutants, are all  
96 corrected in the complemented strains (Figure 1 - figure supplement 1). We also examined other  
97 strains with known OM permeability defects. We detected increased lipid A acylation in strains  
98 with either impaired OMP (*bamB*, *bamD*,  $\Delta$ *surA*) or LPS (*lptD4213*) biogenesis, as would be  
99 expected, but not in strains lacking covalent tethering between the cell wall and the OM ( $\Delta$ *lpp*)  
100 (Figure 1). Even though the  $\Delta$ *lpp* mutant is known to exhibit pleiotropic phenotypes (Yem and  
101 Wu, 1978; Bernadac et al., 1998), it does not have perturbations in OM lipid asymmetry. In  
102 contrast to OMP or LPS assembly mutants, *tol-pal* strains produce WT levels of major OMPs

103 and LPS in the OM (Figure 1 - figure supplement 2). These results indicate that *tol-pal* mutations  
104 lead to accumulation of PLs in the outer leaflet of the OM independent of OMP and LPS  
105 biogenesis pathways.

106

### 107 **Cells lacking the Tol-Pal complex have disrupted OM lipid homeostasis**

108 We hypothesized that the loss of OM lipid asymmetry in *tol-pal* mutants is due to defects  
109 in PL transport across the cell envelope. To test this, we examined the steady-state distribution of  
110 PLs (specifically labelled with [<sup>3</sup>H]-glycerol) between the IM and the OM in WT and *tol-pal*  
111 strains. We established that *tol-pal* mutants have ~1.4-1.6-fold more PLs in their OMs (relative  
112 to the IMs) than the WT strain (Figure 2A and Figure 2 - figure supplement 2). To ascertain if  
113 this altered distribution of PLs between the two membranes was due to the accumulation of more  
114 PLs in the OMs of *tol-pal* mutants, we quantified the ratios of PLs to LPS (both lipids now  
115 labelled with [<sup>14</sup>C]-acetate) following OM isolation and differential extraction. *tol-pal* mutants  
116 contain ~1.5-2.5-fold more PLs (relative to LPS) in their OMs, when compared to the WT strain  
117 (Figure 2B and Figure 2 - figure supplement 3). Since *tol-pal* mutants produce WT LPS levels  
118 (Figure 1 - figure supplement 2B), we conclude that strains lacking the Tol-Pal complex  
119 accumulate excess PLs in their OMs, a phenotype that can be corrected via genetic  
120 complementation (Figure 2). Consistent with this idea, *tol-pal* mutants, unlike WT (Fuhrer et al.,  
121 2006), are able to survive the toxic effects of LPS overproduction (Figure 2 - figure supplement  
122 4), possibly due to a more optimal balance of PLs to LPS in their OMs. Importantly, having  
123 excess PLs makes the OM unstable, which can account for increased permeability of the OM in  
124 *tol-pal* mutants (Llobes et al., 2001). It also explains why these strains produce more OM  
125 vesicles (~34-fold higher than WT cells, albeit only at ~5% of total membranes (Figure 2 - figure  
126 supplement 5))(Bernadac et al., 1998). Furthermore, cells lacking the Tol-Pal complex are on

127 average shorter and wider than WT cells (when grown under conditions with no apparent  
128 division defects) (Gerding et al., 2007); this reflects an increase in surface area of the rod-shaped  
129 cells, perhaps a result of increase in OM lipid content. As expected, we did not observe  
130 disruption of lipid homeostasis in the  $\Delta lpp$  mutant (Figure 2). However, we observed higher PL  
131 content in the OMs of strains defective in OMP assembly. We reasoned that this increase may  
132 help to stabilize the OM by filling the voids created by the decrease in properly-assembled  
133 OMPs. Since strains lacking the Tol-Pal complex have proper OMP assembly (Figure 1 - figure  
134 supplement 2A), the phenotype of excess PL build-up in the OM must be due to a different  
135 problem. Our results suggest that *tol-pal* mutations directly affect PL transport processes, and  
136 therefore OM lipid homeostasis.

137

### 138 **Cells lacking the Tol-Pal complex are defective in retrograde PL transport**

139 Unlike for other OM components, PL transport between the IM and the OM is  
140 bidirectional (Donohue-Rolfe and Schaechter, 1980; Jones and Osborn, 1977; Langley et al.,  
141 1982). Therefore, a simple explanation for the accumulation of excess PLs in the OMs of cells  
142 lacking the Tol-Pal complex is that there are defects in retrograde PL transport. To evaluate this  
143 possibility, we used the turnover of OM PLs (specifically anionic lipids, including  
144 phosphatidylserine (PS), phosphatidylglycerol (PG), and cardiolipin (CL)) as readout for the  
145 transport of PLs back to the IM (Figure 3A). As an intermediate during the biosynthesis of the  
146 major lipid phosphatidylethanolamine (PE), PS is converted to PE by the PS decarboxylase  
147 (PSD) at the IM, and typically exists only at trace levels (Cronan, 2003). PG and CL have  
148 relatively short lifetimes (Kanfer and Kennedy, 1963; Kanemasa et al., 1967). While the  
149 pathways for CL turnover are not known, PG can be converted to PE via PS (Yokoto and Kito,  
150 1982). Since all known enzymes involved in possible pathways of converting PG to PS, and then

151 to PE, are localized in the IM (Cronan, 2003), the turnover of OM anionic lipids require, and  
152 therefore report on, retrograde PL transport. Such an assay has previously been employed to  
153 demonstrate retrograde transport for PS (Langley et al., 1982).

154 Using a strain expressing a temperature-sensitive (Ts) allele (*psd2*) of the gene encoding  
155 PSD (Hawrot and Kennedy, 1978), we pulse-labelled PLs with [<sup>32</sup>P]-phosphate at the restrictive  
156 temperature (42°C), and monitored the turnover of individual PL species in the OM during a  
157 chase period at the permissive temperature (30°C). At 42°C, the *psd2* strain accumulates  
158 substantial amounts of PS in both the IM and the OM (Figure 3B, 0-min time point), as  
159 previously reported (Hawrot and Kennedy, 1978). With the restoration of PSD activity at 30°C,  
160 we observed initial increase but eventual conversion of PS to PE in both membranes (Figure 3B,  
161 after 45-min time point), indicating that OM PS is transported back to the IM, converted to PE,  
162 and subsequently re-equilibrated to the OM (Langley et al., 1982). We also detected higher  
163 PG/CL content in the *psd2* strain at 42°C, and saw rapid conversion of these lipids to PE in both  
164 membranes at 30°C (Figure 3B), at rates comparable to what was previously reported (for PG)  
165 (Yokoto and Kito, 1982). The fact that PS levels increase initially but decrease after 45 min into  
166 the chase is consistent with the idea that PS is an intermediate along the turnover pathway for PG  
167 (Yokoto and Kito, 1982), as well as for CL. To confirm this observation, we also performed the  
168 chase at 42°C in the presence of a known PSD inhibitor (Satre and Kennedy, 1978) (these  
169 conditions completely shut down PSD activity), and found quantitative conversion of PG/CL to  
170 PS in both membranes (Figure 3 - figure supplement 1). We further showed that PG/CL-to-PE  
171 conversion is abolished in the presence of the pmf uncoupler carbonyl cyanide *m*-chlorophenyl  
172 hydrazone (CCCP) (Figure 3C), demonstrating that cellular energy sources are required for this  
173 process (Yokoto and Kito, 1982), and that conversion occurs in the IM. The observation of  
174 PG/CL turnover in the IM is thus expected. The fact that we also observed the conversion of OM



175 PG/CL to PE points towards an intact retrograde PL transport pathway for these lipids in the  
176 otherwise WT cells. Notably, turnover of OM PG/CL appears to be slightly faster than that of IM  
177 PG/CL (Figure 3B), suggesting that retrograde transport of these lipids may be coupled to the  
178 turnover process.

179 We performed the same pulse-chase experiments with *psd2* cells lacking TolA. We  
180 detected PG/CL-to-PE conversion in the IM at rates comparable to WT (Figure 3D and F; ~67%  
181 and ~71% PG/CL turnover at 2 h-chase in  $\Delta tolA$  and WT IMs, respectively (Figure 4A)),  
182 demonstrating that there are functional PG/CL turnover pathways in the  $\Delta tolA$  mutant. In  
183 contrast, we observed substantial reduction of the turnover of OM PG/CL in these cells (Figure  
184 3D and F; ~53% PG/CL turnover at 2 h-chase in the  $\Delta tolA$  OM, compared to ~79% for WT  
185 (Figure 4A)), even though PS conversion to PE appears intact. These results indicate an apparent  
186 defect in the movement of PG and CL (but not PS) from the OM back to the IM, which is  
187 restored when complemented with functional *tolA*<sub>WT</sub> (Figure 3E and F and Figure 4A).  $\Delta tolR$   
188 mutant cells exhibit the same defect, and can similarly be rescued by complementation with  
189 functional *tolR*<sub>WT</sub> (Figure 4A). In contrast, no rescue was observed when  $\Delta tolR$  was  
190 complemented using a *tolR* allele with impaired ability to utilize the pmf (*tolR*<sub>D23R</sub>) (Cascales et  
191 al., 2001) (Figure 4A and Figure 1 - figure supplement 1); this indicates that Tol-Pal function is  
192 required for efficient PG/CL transport. We also examined PG/CL turnover in *psd2* cells lacking  
193 BamB, which accumulate excess PLs in the OM due to defects in OMP assembly (Figure 2).  
194 Neither IM nor OM PG/CL turnover is affected (Figure 4A), highlighting the different basis for  
195 OM PL accumulation in this strain compared to the *tol-pal* mutants. Our assay does not report on  
196 the retrograde transport of major lipid PE, which is relatively stable (Kanfer and Kennedy,  
197 1963). However, since *tol-pal* mutants accumulate ~1.5-fold more PLs in the OM (Figure 2)  
198 without gross changes in PL composition (compared to WT) (Figure 2 - figure supplement 6), PE

199 transport must also have been affected. We conclude that the Tol-Pal complex is required for the  
200 retrograde transport of bulk PLs in *E. coli*.

201

202 **Overexpressing a putative PL transport system partially rescues defects in retrograde PL**  
203 **transport observed in *tol-pal* mutants**

204 Removing the Tol-Pal complex does not completely abolish retrograde PG/CL transport,  
205 indicating that there are other systems involved in this process. The OmpC-Mla system is  
206 important for the maintenance of OM lipid asymmetry, and is proposed to do so via retrograde  
207 PL transport (Malinverni and Silhavy, 2009; Chong et al., 2015). To determine if this system  
208 plays a major role in retrograde PL transport in cells lacking the Tol-Pal complex, we examined  
209 OM PG/CL turnover in  $\Delta tolA$  cells also lacking MlaC, the putative periplasmic lipid chaperone  
210 of the system. We first showed that cells lacking MlaC alone do not exhibit defects in OM  
211 PG/CL turnover (Figure 4A). Evidently, removing MlaC also does not exacerbate the defects in  
212 retrograde PL transport in cells lacking the Tol-Pal complex, given that overall turnover rates of  
213 IM and OM PG/CL are similarly reduced in the double mutant. These results indicate that the  
214 OmpC-Mla system does not contribute significantly to retrograde transport of bulk lipids when  
215 expressed at physiological levels, as has been previously suggested (Malinverni and Silhavy,  
216 2009). We also tested whether overexpressing the OmpC-Mla system can restore retrograde PL  
217 transport in *tol-pal* mutants. Interestingly, overexpression of MlaC and the IM MlaFEDB  
218 complex (Thong et al., 2016), but not MlaA, partially rescues OM PG/CL turnover in the  $\Delta tolA$   
219 mutant (Figure 4B). However, this has no consequential effect on alleviating permeability  
220 defects observed in the  $\Delta tolA$  strain (Figure 4B and Figure 4 - figure supplement 2), presumably  
221 because the OmpC-Mla system may have higher specificity for PG (Thong et al., 2016). Since  
222 PE is the predominant PL species in the OM (Figure 2 - figure supplement 6) (Cronan, 2003),

223 overexpressing the OmpC-Mla system may not effectively reduce the overall build-up of PLs  
224 caused by the loss of Tol-Pal function. Further to validating the putative PL transport function of  
225 the OmpC-Mla system, our observation here lends strong support to the notion that the Tol-Pal  
226 complex may be a major system for retrograde PL transport.

227

## 228 **Discussion**

229

230 Our work reveals that the Tol-Pal complex plays an important role in maintaining OM  
231 lipid homeostasis, possibly via retrograde PL transport. Removing the system causes  
232 accumulation of excess PLs (over LPS) in the OM (Figure 2). While pathways for anterograde  
233 PL transport remain to be discovered, this result indicates that PL flux to the OM may be  
234 intrinsically higher than that of LPS. Evidently, the ability to transport high levels of PLs to the  
235 OM allows cells to compensate for the loss of OMPs due to defects in assembly (Figure 2). Our  
236 data suggest that cells maintain an excess flux of PLs to the OM in order to offset changes in the  
237 unidirectional assembly pathways for other OM components, and then return the PL surplus to  
238 the IM via retrograde transport. Having bidirectional PL transport therefore provides a  
239 mechanism to regulate and ensure the formation of a stable OM.

240 It is not clear whether the Tol-Pal complex directly mediates retrograde PL transport. It is  
241 formally possible that the effects we have observed on retrograde PL transport are due to indirect  
242 effects of removing the Tol-Pal complex on other OM processes. However, we have already  
243 shown that removing this complex does not affect the assembly of both OMPs and LPS, two  
244 major components in the OM (Figure 1 - figure supplement 2). Consistently, we have  
245 demonstrated that strains with impaired OMP assembly do not have defects in retrograde PL  
246 transport (Figure 4A). We have also examined our strains under conditions where *tol-pal* mutants

247 do not exhibit apparent division defects (Gerding et al., 2007); it is thus unlikely that there could  
248 be indirect effects on retrograde PL transport arising from the role of the Tol-Pal complex during  
249 cell division. Therefore, we believe that the Tol-Pal complex may directly mediate PL transport.  
250 One possibility is that this machine directly binds and transports lipids, although there are no  
251 obvious lipid binding motifs or cavities found in available structures of the periplasmic  
252 components (Deprez C et al., 2005; Carr et al., 2000). The Tol-Pal complex is related to the  
253 ExbBD-TonB (Cascales et al., 2001; Celia et al., 2016), Agl-Glt (Faure et al., 2016), and Mot  
254 (Cascales et al., 2001; Thormann and Paulick, 2010) systems, each of which uses pmf-energized  
255 conformational changes to generate force for the uptake of metal-siderophores, for gliding  
256 motility, or to power flagella rotation, respectively. In addition, both the Tol-Pal and ExbBD-  
257 TonB complexes are hijacked by toxins (such as colicins) and bacteriophages to penetrate the  
258 OM (Cascales et al., 2007). It is therefore also possible that the Tol-Pal complex acts simply as a  
259 force generator to transport other PL-binding proteins across the periplasm, or perhaps bring the  
260 OM close enough to the IM for PL transfer to occur via hemifusion events. For the latter  
261 scenario, one can envision energized TolA pulling the OM inwards via its interaction with Pal,  
262 which is anchored to the inner leaflet of the OM (Godlewska et al., 2009). While it remains  
263 controversial, the formation of such “zones of adhesion”, or membrane contact sites, has  
264 previously been proposed (Bayer, 1991), and in fact, was suggested to be a mechanism for  
265 retrograde transport of native and foreign lipids (Jones and Osborn, 1977).

266 That the Tol-Pal complex is involved in retrograde PL transport also has significant  
267 implications for Gram-negative bacterial cell division. As part of the divisome, this system is  
268 important for proper OM invagination during septum constriction (Gerding et al., 2007; Yeh et  
269 al., 2010; Jacquier et al., 2015). How OM invagination occurs is unclear. Apart from physically  
270 tethering the IM and the OM, we propose that removal of PLs from the inner leaflet of the OM,

271 possibly by the Tol-Pal complex, serves to locally reduce the surface area of the inner leaflet  
272 relative to the outer leaflet (McMahon and Gallop, 2005). According to the bilayer-couple model  
273 (Sheetz and Singer, 1974), this may then induce the requisite negative curvature in the OM at the  
274 constriction site, thus promoting formation of the new cell poles.

275         Given the importance of the Tol-Pal complex in OM stability and bacterial cell division,  
276 it would be an attractive target for small molecule inhibition. This is especially so in some  
277 organisms, including the opportunistic human pathogen *Pseudomonas aeruginosa*, where the  
278 complex is essential for growth (Dennis et al., 1996; Lo Sciuto et al., 2014). The lack of  
279 understanding of the true function of the Tol-Pal complex, however, has impeded progress. We  
280 believe that our work in elucidating a physiological role of this complex will accelerate efforts in  
281 this direction, and contribute towards the development of new antibiotics in our ongoing fight  
282 against recalcitrant Gram-negative infections.

283

## 284 **Materials and Methods**

285

### 286 Bacterial strains and growth conditions

287         All the strains used in this study are listed in Supplementary file 1A. *Escherichia coli*  
288 strain MC4100 [*F* *araD139*  $\Delta$ (*argF-lac*) *UI69 rpsL150 relA1 flbB5301 ptsF25 deoC1 ptsF25*  
289 *thi*] (Casadaban, 1976) was used as the wild-type (WT) strain for most of the experiments. To  
290 achieve accumulation of phosphatidylserine (PS) in cells, a temperature-sensitive  
291 phosphatidylserine decarboxylase mutant (*psd2*), which accumulates PS at the non-permissive  
292 temperature, was used (Hawrot and Kennedy, 1978). NR754, an *araD*<sup>+</sup> revertant of MC4100  
293 (Ruiz et al., 2008), was used as the WT strain for experiments involving overexpression of *lpxC*  
294 from the arabinose-inducible promoter ( $P_{BAD}$ ).  $\Delta$ *tolQ*,  $\Delta$ *tolA* and  $\Delta$ *tol-pal* deletions were

295 constructed using recombineering (Datsenko and Wanner, 2000) and all other gene deletion  
296 strains were obtained from the Keio collection (Baba et al., 2006). Whenever needed, the  
297 antibiotic resistance cassettes were flipped out as described (Datsenko and Wanner, 2000). Gene  
298 deletion cassettes were transduced into relevant genetic background strains via P1 transduction  
299 (Silhavy et al., 1984). Luria-Bertani (LB) broth (1% tryptone and 0.5% yeast extract,  
300 supplemented with 1% NaCl) and agar were prepared as previously described (Silhavy et al.,  
301 1984). Strains were grown in LB medium with shaking at 220 rpm at either 30°C, 37°C, or 42°C,  
302 as indicated. When appropriate, kanamycin (Kan; 25  $\mu\text{g ml}^{-1}$ ), chloramphenicol (Cam; 30  $\mu\text{g ml}^{-1}$ )  
303 and ampicillin (Amp; 125  $\mu\text{g ml}^{-1}$ ) were added.

304

305

306 Plasmid construction

307 All the plasmids used in this study are listed in Supplementary file 1B. Desired genes were  
308 amplified from MC4100 chromosomal DNA using the indicated primers (sequences in  
309 Supplementary file 1C). Amplified products were digested with indicated restriction enzymes  
310 (New England Biolabs), which were also used to digest the carrying vector. After ligation,  
311 recombinant plasmids were transformed into competent NovaBlue (Novagen) cells and selected  
312 on LB plates containing appropriate antibiotics. DNA sequencing (Axil Scientific, Singapore)  
313 was used to verify the sequence of the cloned gene.

314 To generate *tolR<sub>D23R</sub>* mutant construct, site-directed mutagenesis was conducted using  
315 relevant primers listed in Supplementary file 1C with pET23/42*tolR* as the initial template.  
316 Briefly, the entire template was amplified by PCR and the resulting PCR product mixture  
317 digested with DpnI for > 1 h at 37°C. Competent NovaBlue cells were transformed with 1 µl of  
318 the digested PCR product and plated onto LB plates containing ampicillin. DNA sequencing  
319 (Axil Scientific, Singapore) was used to verify the introduction of the desired mutation.

320

321 Analysis of [<sup>32</sup>P]-labelled lipid A

322 Mild acid hydrolysis was used to isolate lipid A as previously described (Zhou et al.,  
323 1999) with some modifications. 5-ml cultures were grown in LB broth (inoculated from an  
324 overnight culture at 1:100 dilution) containing [<sup>32</sup>P]-disodium phosphate (final 1 µCi ml<sup>-1</sup>; Perkin  
325 Elmer product no. NEX011001MC) till mid-log phase (OD<sub>600</sub> ~0.5 - 0.7). One MC4100 WT  
326 culture labelled with [<sup>32</sup>P] was treated with EDTA (25 mM pH 8.0) for 10 min prior to  
327 harvesting. Cells were harvested at 4,700 x g for 10 min, washed twice with 1 ml PBS (137 mM  
328 NaCl, 2.7 mM KCl, 10 mM Na<sub>2</sub>HPO<sub>4</sub>, 1.8 mM KH<sub>2</sub>PO<sub>4</sub>, pH 7.4) and suspended in PBS (0.32  
329 ml) again. Chloroform (0.4 ml) and methanol (0.8 ml) were added and the mixtures were

330 incubated at room temperature for 20 min with slow shaking (60 rpm) to make the one-phase  
331 Bligh-Dyer mixture (chloroform:methanol:water = 1:2:0.8). Mixtures were then centrifuged at  
332 21,000 x g for 30 min. Pellets obtained were washed once with fresh one-phase Bligh-Dyer  
333 system (1 ml) and centrifuged as above. Resulting pellets were suspended in 0.45 ml of sodium  
334 acetate (12.5 mM, pH 4.5) containing SDS (1 %) and heated at 100°C for 30 min. After cooling  
335 to room temperature, chloroform and methanol (0.5 ml each) were added to create a two-phase  
336 Bligh-Dyer mixture (chloroform:methanol:water = 2:2:1.8). The lower (organic) phase of each  
337 mixture was collected after phase partitioning via centrifugation at 21,000 x g for 30 min. This  
338 was washed once with upper phase (0.5 ml) of freshly prepared two-phase Bligh-Dyer mixture  
339 and centrifuged as above. Finally, all the collected lower phases containing [<sup>32</sup>P]-labelled lipid A  
340 were air-dried overnight. Dried radiolabelled lipid A samples were suspended in 50 µl of  
341 chloroform:methanol (2:1) and equal amounts (~1,000 cpm) of radioactivity were spotted on  
342 silica-gel coated TLC (Thin Layer Chromatography) plates (Merck). TLCs were developed in  
343 chambers pre-equilibrated overnight with solvent system chloroform:pyridine:98 % formic  
344 acid:water (50:50:14.6:5). TLC plates were air-dried overnight and later visualized by phosphor  
345 imaging (STORM, GE healthcare). The densitometric analysis of the spots obtained on the  
346 phosphor images of TLCs was carried out using ImageQuant TL analysis software (version 7.0,  
347 GE Healthcare). Average levels of hepta-acylated lipid A (expressed as a percentage of total  
348 lipid A in each sample) were obtained from three independent experiments.

349

350

351

352 Sucrose density gradient fractionation



353 Sucrose density gradient centrifugation was performed as previously described (Chng et  
354 al., 2010) with some modifications. For each strain, a 10/50-ml culture (inoculated from an  
355 overnight culture at 1:100 dilution) was grown in LB broth until OD<sub>600</sub> reached ~0.5 – 0.7. For  
356 radiolabeling, indicated radioisotopes were added from the start of inoculation. Cells were  
357 harvested by centrifugation at 4,700 x g for 10 min, suspended to wash once in 5 ml of cold  
358 Buffer A (Tris-HCl, 10 mM pH 8.0), and centrifuged as above. Cells were resuspended in 6 ml  
359 of Buffer B (Tris-HCl, 10 mM pH 8.0 containing 20% sucrose (w/w), 1 mM PMSF and 50 µg ml  
360 <sup>-1</sup> DNase I), and lysed by a single passage through a high pressure French press (French Press G-  
361 M, Glen Mills) homogenizer at 8,000 psi. Under these conditions, lipid mixing between inner  
362 and outer membranes is minimal (Chng et al., 2010). Unbroken cells were removed by  
363 centrifugation at 4,700 x g for 10 min. The cell lysate was collected, and 5.5 ml of cell lysate was  
364 layered on top of a two-step sucrose gradient consisting of 40% sucrose solution (5 ml) layered  
365 on top of 65% sucrose solution (1.5 ml) at the bottom of the tube. All sucrose (w/w) solutions  
366 were prepared in Buffer A. Samples were centrifuged at 39,000 rpm for 16 h in a Beckman  
367 SW41 rotor in an ultracentrifuge (Model XL-90, Beckman). 0.8-ml fractions (usually 15  
368 fractions) were manually collected from the top of each tube.

369

#### 370 Analysis of OMP and LPS levels in isolated OMs

371 OM fragments were isolated from 50 ml of cells following growth, cell lysis and  
372 application of sucrose density gradient fractionation, as described above. Instead of manual  
373 fractionation, OM fragments (~1 ml) were isolated from the 40%/65% sucrose solution interface  
374 by puncturing the side of the tube with a syringe. Buffer A (1 ml) was added to the OM  
375 fragments to lower the sucrose concentration and reduce viscosity. The OM fragments were then  
376 pelleted in a microcentrifuge at 21,000 x g for 30 min and then resuspended in 200 - 250 µl

377 Buffer A. Protein concentrations of these OM preparations were determined using Bio-Rad  $D_C$   
378 protein assay. The same amount of OM (based on protein content) for each strain was analyzed  
379 by reducing SDS-PAGE and immunoblotted using antibodies directed against OmpC, OmpF,  
380 LamB, BamA, LptE and LPS. For LPS quantification, five-fold serial dilutions of WT OMs were  
381 ran alongside the other OM samples as standards. Densitometric analysis of the LPS bands was  
382 carried out using ImageJ analysis software, and calibrated using ratio standard curves generated  
383 from the serial dilution standards (Pitre et al., 2007). LPS levels found in the OMs of indicated  
384 strains were normalized to WT. This quantification was performed three times for the same  
385 samples, and the average data was plotted.

386

#### 387 Analysis of steady-state [ $^3\text{H}$ ]-glycerol-labelled PL distribution in IMs and OMs

388 To specifically label cellular PLs, 10-ml cells were grown at 37°C in LB broth  
389 (inoculated from an overnight culture at 1:100 dilution) containing [ $2\text{-}^3\text{H}$ ]-glycerol (final 1  $\mu\text{Ci}$   
390  $\text{ml}^{-1}$ ; Perkin Elmer product no. NET022L001MC) until  $\text{OD}_{600}$  reached  $\sim 0.5 - 0.7$ . Once the  
391 desired  $\text{OD}_{600}$  was achieved, cultures were immediately mixed with ice-cold Buffer A containing  
392 CCCP (50  $\mu\text{M}$ ) to stop the labeling of the cultures. Cells were pelleted, lysed, and fractionated  
393 on sucrose density gradients, as described above. 0.8-ml fractions were collected from each tube,  
394 as described above, and 300  $\mu\text{l}$  from each fraction was mixed with 2 ml of Ultima Gold  
395 scintillation fluid (Perkin Elmer, Singapore). Radioactivity ([ $^3\text{H}$ ]-count) was measured on a  
396 scintillation counter (MicroBeta<sup>2</sup><sup>®</sup>, Perkin-Elmer). Based on [ $^3\text{H}$ ]-profiles, IM and OM peaks  
397 were identified and peak areas determined after background subtraction (average count of first 5  
398 fractions was taken as background). For each strain, relative [ $^3\text{H}$ ]-PL levels in the IM and OM  
399 were expressed as a percentage of the sum in both membranes (see Figure 2A upper panel). The  
400 average percent [ $^3\text{H}$ ]-PL in the OM for each strain (obtained from three independent

401 experiments) was then compared to that for the WT strain to calculate fold changes (see Figure  
402 2A lower panel).

403

404 Determination of PL/LPS ratios in [<sup>14</sup>C]-acetate labelled OMs (see Fig. S5 for workflow and  
405 results)

406 To specifically label all cellular lipids (including LPS), 10-ml cells were grown at 37°C  
407 in LB broth (inoculated from an overnight culture at 1:100 dilution) containing [1-<sup>14</sup>C]-acetate  
408 (final 0.2 μCi ml<sup>-1</sup>; Perkin Elmer product no. NEC084A001MC) until OD<sub>600</sub> reached ~0.5 – 0.7.  
409 At this OD, cultures were transferred immediately to ice-cold Buffer A (5 ml), pelleted, lysed,  
410 and fractionated on sucrose density gradients, as described above. 0.8-ml fractions were  
411 collected from each tube, as described above, and 50 μl from each fraction was mixed with 2 ml  
412 of Ultima Gold scintillation fluid (Perkin Elmer, Singapore). Based on [<sup>14</sup>C]-profiles, IM and  
413 OM peaks were identified. OM fractions were then pooled, and treated as outlined below to  
414 differentially extract PLs and LPS for relative quantification within each OM pool. For each  
415 strain, the whole experiment was conducted and the OM PL/LPS ratio obtained three times.

416 Each OM pool (0.32 ml) was mixed with chloroform (0.4 ml) and methanol (0.8 ml) to  
417 make a one-phase Bligh-Dyer mixture (chloroform:methanol:water = 1:2:0.8). The mixtures  
418 were vortexed for 2 min and later incubated at room temperature for 20 min with slow shaking at  
419 60 rpm. After centrifugation at 21,000 x g for 30 min, the supernatants (S1) were collected. The  
420 resulting pellets (P1) were washed once with fresh 0.95 ml one-phase Bligh-Dyer solution and  
421 centrifuged as above. The insoluble pellets (P2) were air dried and used for LPS quantification  
422 (see below). The supernatants obtained in this step (S2) were combined with S1 to get the  
423 combined supernatants (S3), which contained radiolabelled PLs. To these, chloroform (0.65 ml)  
424 and methanol (0.65 ml) were added to convert them to two-phase Bligh-Dyer mixtures

425 (chloroform:methanol:water = 2:2:1.8). After a brief vortexing step, the mixtures were  
426 centrifuged at 3000 x g for 10 min to separate the immiscible phases, and the lower organic  
427 phases were collected. These were washed once with equal volumes of water and centrifuged as  
428 above, and the lower organic phases (containing radiolabelled PLs) recollected and air dried.  
429 Finally, the dried PLs were dissolved in 50 µl of a mixture of chloroform:methanol (2:1). Equal  
430 volumes (20 µl) of PL solutions were mixed with 2 ml of Ultima Gold scintillation fluid (Perkin  
431 Elmer, Singapore). The [<sup>14</sup>C]-counts were measured using scintillation counting (MicroBeta<sup>2</sup>®,  
432 Perkin-Elmer) and taken as the levels of PLs isolated from the OMs.

433 To quantify LPS, the P2 pellets were suspended in 2X reducing SDS-PAGE loading  
434 buffer (40 µl) and boiled for 10 min. Equal volumes (15 µl) were loaded and subjected to SDS-  
435 PAGE (15% Tris.HCl). Gels were air-dried between porous films (Invitrogen) and exposed to  
436 the same phosphor screen along with standards (GE healthcare). To generate a standard curve for  
437 LPS quantification, the WT OM pellet sample was serially diluted two-fold and equal volumes  
438 of diluted samples were resolved on SDS-PAGE and dried as above. The densitometric analysis  
439 of bands (i.e. LPS from each OM) was carried out using ImageQuant TL analysis software  
440 (version 7.0, GE Healthcare). To allow proper comparison and quantification, the LPS gels from  
441 triplicate experiments were exposed on the same phosphor screen along with the standards (see  
442 Figure 2 - figure supplement 3).

443 For each strain, the arbitrary PL/LPS ratio in the OM was obtained by taking the levels of  
444 PLs (represented by [<sup>14</sup>C]-counts of PL fraction) divided by the LPS levels (represented by gel  
445 band density), averaged across three independent replicates (see Figure 2 - figure supplement 3C  
446 and Figure 2B upper panel). The average PL/LPS ratio in the OM for each strain was then  
447 compared to that for the WT strain to calculate fold changes (see Figure 2B lower panel).

448

449 Quantification of OM vesiculation

450 For each strain, 10-ml cells were grown at 37°C in LB broth (inoculated from an  
451 overnight culture at 1:100 dilution) containing [1-<sup>14</sup>C]-acetate (final 0.2 μCi ml<sup>-1</sup>; Perkin Elmer  
452 product no. NEC084A001MC) until OD<sub>600</sub> reached ~0.7. At this OD, cultures were harvested to  
453 obtain the cell pellets, and supernatants containing OM vesicles. Cell pellets were washed twice  
454 with Buffer A and finally suspended in the same buffer (0.2 ml). To obtain OM vesicles,  
455 supernatants were filtered through 0.45 μm filters followed by ultracentrifugation in a SW41.Ti  
456 rotor at 39,000 rpm for 1 h. Finally, the OM vesicles in the resulting pellets were washed and re-  
457 suspended in 0.2 ml of Buffer A. Radioactive counts in cell pellets and OM vesicles were  
458 measured after mixing with 2 ml of Ultima Gold scintillation fluid (Perkin Elmer, Singapore).  
459 Radioactivity ([<sup>14</sup>C]-count) was measured on a scintillation counter (MicroBeta<sup>2</sup>®, Perkin-  
460 Elmer).

461

462 PG/CL turnover assay (pulse-chase and single time-point (2-h) analysis)

463 PG/CL turnover pulse-chase experiments were performed using the *psd2* background,  
464 which accumulated PS and PG/CL during growth at restrictive temperature. For each strain, cells  
465 were grown in 70 ml LB broth (inoculated from an overnight culture at 1:100 dilution) at the  
466 permissive temperature (30°C) until OD<sub>600</sub> reached ~0.15 - 0.2. The culture was then shifted for  
467 4 h at the restrictive temperature (42°C) and labelled with [<sup>32</sup>P]-disodium phosphate (final 1 μCi  
468 ml<sup>-1</sup>) during the last 30 min at the restrictive temperature (42°C). After labeling, cells were  
469 harvested by centrifugation at 4,700 x g for 10 min, washed once with cold LB broth (10 ml) and  
470 centrifuged again at 4,700 x g for 10 min. Cells were then resuspended in fresh LB broth (70 ml)  
471 and the chase was started in the presence of non-radioactive disodium phosphate (1000-fold  
472 molar excess) at either the permissive temperature, with or without addition of carbonyl cyanide

473 *m*-chlorophenyl hydrazone (CCCP; 50  $\mu$ M), or at the restrictive temperature in the presence of  
474 hydroxylamine (HA; 10 mM). At the start (0 min) and different times (15, 30, 45, 90 and 120  
475 min) during the chase, a portion of the culture (either 15 ml or 10 ml) was collected and mixed  
476 immediately with equal volume of ice-cold Buffer A containing CCCP (50  $\mu$ M) and  
477 hydroxylamine (10 mM). Cells were harvested by centrifugation at 4,700 x *g* for 10 min and then  
478 resuspended in 6 ml of Buffer B containing CCCP (50  $\mu$ M) and hydroxylamine (10 mM). Cells  
479 were lysed, and fractionated on sucrose density gradients, as described above. 0.8-ml fractions  
480 were collected from each tube, as described above. Fractions 7-9 and 12-14 contained the IM and  
481 OM fractions, respectively. To extract PLs from the IM and OM pools (2.4 ml), methanol (6 ml)  
482 and chloroform (3 ml) were added to make one-phase Bligh-Dyer mixtures. These were  
483 incubated at room temperature for 60 min with intermittent vortexing. Chloroform (3 ml) and  
484 sterile water (3 ml) were then added to generate two-phase Bligh-Dyer mixtures. After brief  
485 vortexing, the lower organic phases were separated from the top aqueous phases by  
486 centrifugation at 3,000 x *g* for 10 min. These were washed once with equal volumes of water and  
487 centrifuged as above, and the lower organic phases (containing radiolabelled PLs) recollected  
488 and air dried. Finally, the dried PLs were dissolved in 40  $\mu$ l of a mixture of chloroform:methanol  
489 (2:1) and spotted onto silica-gel coated TLC plates (Merck). Equal amounts (in cpm) of  
490 radioactivity were spotted for each sample. TLCs were developed in pre-equilibrated chambers  
491 containing solvent system chloroform:methanol:water (65:25:4). TLC plates were dried, and  
492 visualized by phosphor imaging (STORM, GE healthcare). Densitometric analysis of the PL  
493 spots on the phosphor image of TLCs was conducted using the ImageQuant TL analysis software  
494 (version 7.0, GE Healthcare). The levels of each major PL species were expressed as a  
495 percentage of all detected PL species (essentially the whole lane), and plotted against time (see  
496 Figures 3 and Figure 3 - figure supplement 1).

497 For single time-point analysis, 30-ml cultures were grown and labelled with [<sup>32</sup>P]-  
498 disodium phosphate (final 1  $\mu\text{Ci ml}^{-1}$ ) at the restrictive temperature. For strains harboring  
499 plasmids used for overexpressing OmpC-Mla components, arabinose (0.2 %) was added during  
500 growth at the permissive as well as restrictive temperatures. After washing and resuspension in  
501 fresh LB broth (30 ml), the chase was started in the presence of non-radioactive disodium  
502 phosphate (1000-fold molar excess) at the permissive temperature. At start (0 h) and 2 h during  
503 the chase, a portion of the culture (15 and 10 ml) was collected and processed similarly as pulse  
504 chase analysis described above. The levels of PG/CL in the membranes at each time point were  
505 expressed as a percentage of the sum of PE, PS and PG/CL. For each strain, IM and OM PG/CL  
506 turnover were expressed as the difference between percentage PG/CL levels at 0-h and 2-h time  
507 points divided by that at 0-h. Average PG/CL turnover values were obtained from three  
508 independent experiments conducted (see Figure 4 and Figure 4 - figure supplement 1).

509

510

511 OM permeability assay

512 OM sensitivity against SDS/EDTA was judged by colony-forming unit (cfu) analyses on  
513 LB agar plates containing indicated concentrations of SDS/EDTA. Briefly, 5-ml cultures were  
514 grown (inoculated with overnight cultures at 1:100 dilution) in LB broth at 37°C until OD<sub>600</sub>  
515 reached ~1.0. Cells were normalized according to OD<sub>600</sub>, first diluted to OD<sub>600</sub> = 0.1 (~10<sup>8</sup> cells),  
516 and then serial diluted in LB with seven 10-fold dilutions using 96-well microtiter plates  
517 (Corning). Two microliters of the diluted cultures were manually spotted onto the plates and  
518 incubated overnight at 37°C.

519

520 LpxC overexpression (growth curves and viability assay)

521 For each strain, a 10-ml culture was inoculated in LB broth supplemented with arabinose  
522 (0.2 %) from the overnight culture to make the initial OD<sub>600</sub> of 0.05. Cells were grown at 37°C  
523 and the OD<sub>600</sub> of the cultures was measured hourly. At the start of growth (0 h) and at 4 and 7 h  
524 during growth, 100 µl of cells were collected and then serial diluted in LB/cam with six 10-fold  
525 dilutions using 96-well microtiter plates (Corning). Five microliters of the non-diluted and  
526 diluted cultures were manually spotted on LB/cam agar plates (no arabinose). Plates were  
527 incubated overnight at 37°C.

528

529 IM (NADH activity) and OM marker (LPS) analysis during sucrose gradient fractionation

530 The inner membrane enzyme, NADH oxidase, was used as a marker for the IM; its  
531 activity was measured as previously described (56). Briefly, 30 µl of each fraction from the  
532 sucrose density gradient was diluted 4-fold with 20 mM Tris.HCl, pH 8.0 in a 96-well format  
533 and 120 µl of 100 mM Tris.HCl, pH 8.0 containing 0.64 mM NADH (Sigma) and 0.4 mM  
534 dithiothreitol (DTT, Sigma) was added. Changes in fluorescence over time due to changes in



535 NADH ( $\lambda_{\text{ex}} = 340 \text{ nm}$ ,  $\lambda_{\text{em}} = 465 \text{ nm}$ ) concentration was monitored using a plate reader (Perkin  
536 Elmer). The activity of NADH oxidase in pooled IM and OM fractions relative to the sum of  
537 these fractions was determined.

538 LPS was used as a marker for the OM and detected using LPS dot blots. OM fractions  
539 were pooled together and 2  $\mu\text{l}$  of the fractions were spotted on nitrocellulose membranes (Bio-  
540 Rad). Spotted membranes were allowed to dry at room temperature for 1 h and then the  
541 membranes were probed with antibodies against LPS.

542

#### 543 SDS-PAGE and immunoblotting

544 All samples subjected to SDS-PAGE were mixed with 2X Laemmli reducing buffer and  
545 boiled for 10 min at 100°C. Equal volumes of the samples were loaded onto the gels. Unless  
546 otherwise stated, SDS-PAGE was performed according to Laemmli using the 12% or 15%  
547 Tris.HCl gels (Laemmli, 1970). Immunoblotting was performed by transferring protein bands  
548 from the gels onto polyvinylidene fluoride (PVDF) membranes (Immun-Blot® 0.2  $\mu\text{m}$ , Bio-Rad)  
549 using the semi-dry electroblotting system (Trans-Blot® Turbo™ Transfer System, Bio-Rad).  
550 Membranes were blocked using 1X casein blocking buffer (Sigma). Mouse monoclonal  $\alpha$ -OmpC  
551 antibody was a gift from Swaine Chen and used at a dilution of 1:5,000 (Khetrapal et al., 2015).  
552 Rabbit  $\alpha$ -LptE (from Daniel Kahne) (Chng et al., 2010) and  $\alpha$ -OmpF antisera (Rajeev Misra)  
553 (Charlson et al., 2006) were used at 1:5,000 dilutions. Rabbit  $\alpha$ -BamA antisera (from Daniel  
554 Kahne) was used at 1:40,000 dilution. Rabbit  $\alpha$ -LpxC antisera (generous gift from Franz  
555 Narberhaus) was used at 1:5,000 dilution. Mouse monoclonal  $\alpha$ -LPS antibody (against LPS-core)  
556 was purchased from Hycult biotechnology and used at 1:5,000 dilutions. Rabbit polyclonal  $\alpha$ -  
557 LamB antibodies was purchased from Bioss (USA) and used at 1:1,000 dilution.  $\alpha$ -mouse IgG  
558 secondary antibody conjugated to HRP (from sheep) and  $\alpha$ -rabbit IgG secondary antibody

559 conjugated to HRP (from donkey) were purchased from GE Healthcare and used at 1:5,000  
560 dilutions. Luminata Forte Western HRP Substrate (Merck Milipore) was used to develop the  
561 membranes and chemiluminescent signals were visualized by G:BOX Chemi XT 4 (Genesys  
562 version1.3.4.0, Syngene).

563

564 **Acknowledgments**

565

566 We thank Zhi-Soon Chong for constructing the  $\Delta mlaC$  allele, and Chee-Geng Chia for  
567 performing preliminary experiments. We are grateful to Swaine Chen (NUS), Rajeev Misra  
568 (Arizona State U), Daniel Kahne (Harvard U) and Franz Narberhous (RUHR Universitat  
569 Bochum) for their generous gifts of  $\alpha$ -OmpC,  $\alpha$ -OmpF,  $\alpha$ -LptE and  $\alpha$ -BamA, and  $\alpha$ -LpxC  
570 antibodies, respectively. Finally, we thank William F. Burkholder (Institute of Molecular and  
571 Cell Biology) and Jean-Francois Collet (U Catholique de Louvain) for critical comments and  
572 suggestions on the manuscript. This work was supported by the National University of Singapore  
573 Start-up funding, the Singapore Ministry of Education Academic Research Fund Tier 1 and Tier  
574 2 (MOE2013-T2-1-148) grants, and the Singapore Ministry of Health National Medical Research  
575 Council under its Cooperative Basic Research Grant (NMRC/CBRG/0072/2014) (all to S.-S.C.).

576 **References**

- 577 Baba T, et al. (2006) Construction of *Escherichia coli* K-12 in-frame, single-gene knockout  
578 mutants: the Keio collection. *Mol Syst Biol* 2:2006.0008.
- 579 Bayer ME (1991) Zones of membrane adhesion in the cryofixed envelope of *Escherichia coli*. *J*  
580 *Struct Biol* 107(3):268-280.
- 581 Bernadac A, Gavioli M, Lazzaroni JC, Raina S, Lloubes R (1998) *Escherichia coli tol-pal*  
582 mutants form outer membrane vesicles. *J Bacteriol* 180(18):4872-4878.
- 583 Bernstein A, Rolfe B, Onodera K (1972) Pleiotropic properties and genetic organization of the  
584 *tolA, B* locus of *Escherichia coli* K-12. *J Bacteriol* 112(1):74-83.
- 585 Bishop RE (2005) The lipid A palmitoyltransferase PagP: molecular mechanisms and role in  
586 bacterial pathogenesis. *Mol Microbiol* 57(4):900-912.
- 587 Carr S, Penfold CN, Bamford V, James R, Hemmings AM (2000) The structure of TolB, an  
588 essential component of the *tol*-dependent translocation system, and its protein-protein  
589 interaction with the translocation domain of colicin E9. *Structure* 8(1):57-66.
- 590 Casadaban MJ (1976) Transposition and fusion of the *lac* genes to selected promoters  
591 in *Escherichia coli* using bacteriophage lambda and Mu. *J Mol Biol* 104(3):541-555.
- 592 Cascales E, Gavioli M, Sturgis JN, Lloubes R (2000) Proton motive force drives the interaction  
593 of the inner membrane TolA and outer membrane Pal proteins in *Escherichia coli*. *Mol*  
594 *Microbiol* 38(4):904-915.
- 595 Cascales E, Lloubes R, Sturgis JN (2001) The TolQ-TolR proteins energize TolA and share  
596 homologies with the flagellar motor proteins MotA-MotB. *Mol Microbiol* 42(3):795-807.
- 597 Cascales E, et al. (2007) Colicin biology. *Microbiol Mol Biol Rev* 71(1):158-229.
- 598 Celia H, et al. (2016) Structural insight into the role of the Ton complex in energy transduction.  
599 *Nature* 538(7623):60-65.

- 600 Charlson ES, Werner JN, Misra R (2006) Differential effects of *yfgL* mutation on *Escherichia*  
601 *coli* outer membrane proteins and lipopolysaccharide. *J Bacteriol* 188(20):7186-7194.
- 602 Chong ZS, Woo WF, Chng SS (2015) Osmoporin OmpC forms a complex with MlaA to  
603 maintain outer membrane lipid asymmetry in *Escherichia coli*. *Mol Microbiol* 98(6):1133-  
604 1146.
- 605 Chng SS, Gronenberg LS, Kahne D (2010) Proteins required for lipopolysaccharide transport in  
606 *Escherichia coli* form a transenvelope complex. *Biochemistry* 49(22):4565-4567.
- 607 Clavel T, Lazzaroni JC, Vianney A, Portalier R (1996) Expression of the *tolQRA* genes of  
608 *Escherichia coli* K-12 is controlled by the RcsC sensor protein involved in capsule synthesis.  
609 *Mol Microbiol* 19(1):19-25.
- 610 Cronan JE (2003) Bacterial membrane lipids: where do we stand? *Annu Rev Microbiol* 57:203-  
611 224.
- 612 Dalebroux ZD, Matamouros S, Whittington D, Bishop RE, Miller SI (2014) PhoPQ regulates  
613 acidic glycerophospholipid content of the *Salmonella typhimurium* outer membrane. *Proc*  
614 *Natl Acad Sci USA* 111(5):1963-1968.
- 615 Datsenko KA, Wanner BL (2000) One-step inactivation of chromosomal genes in *Escherichia*  
616 *coli* K-12 using PCR products. *Proc Natl Acad Sci USA* 97(12):6640-6645.
- 617 Dennis JJ, Lafontaine ER, Sokol PA (1996) Identification and characterization of the *tolQRA*  
618 genes of *Pseudomonas aeruginosa*. *J Bacteriol* 178(24):7059-7068.
- 619 Deprez C, et al. (2005) Solution structure of the *E. coli* TolA C-terminal domain reveals  
620 conformational changes upon binding to the phage g3p N-terminal domain. *J Mol Biol*  
621 346(4):1047-1057.
- 622 Donohue-Rolfe AM, Schaechter M (1980) Translocation of phospholipids from the inner to the  
623 outer membrane of *Escherichia coli*. *Proc Natl Acad Sci USA* 77(4):1867-1871.

- 624 Faure LM, et al. (2016) The mechanism of force transmission at bacterial focal adhesion  
625 complexes. *Nature* 539(7630):530-535.
- 626 Fuhrer F, Langklotz S, Narberhaus F (2006) The C-terminal end of LpxC is required for  
627 degradation by the FtsH protease. *Mol Microbiol* 59(3):1025-1036.
- 628 Gerding MA, Ogata Y, Pecora ND, Niki H, de Boer PAJ (2007) The trans-envelope Tol-Pal  
629 complex is part of the cell division machinery and required for proper outer-membrane  
630 invagination during cell constriction in *E. coli*. *Mol Microbiol* 63(4):1008-1025.
- 631 Germon P, Ray MC, Vianney A, Lazzaroni JC (2001) Energy-dependent conformational changes  
632 in the TolA protein of *Escherichia coli* involves its N-terminal domain, TolQ, and TolR. *J*  
633 *Bacteriol* 183(14):4110-4114.
- 634 Gresock MG, Kastead KA, Postle K (2015) From homodimer to heterodimer and back:  
635 elucidating the TonB energy transduction cycle. *J Bacteriol* 197(21):3433-3445.
- 636 Godlewska R, Wisniewska K, Pietras Z, Jagusztyn-Krynicka EK (2009) Peptidoglycan-  
637 associated lipoprotein (Pal) of Gram-negative bacteria: function, structure, role in  
638 pathogenesis and potential application in immunoprophylaxis. *FEMS Microbiol Lett* 298(1):1-  
639 11.
- 640 Gully D, Bouveret E (2006) A protein network for phospholipid synthesis uncovered by a variant  
641 of the tandem affinity purification method in *Escherichia coli*. *Proteomics* 6:282-293.
- 642 Guzman LM, Belin D, Carson MJ, Beckwith J (1995) Tight regulation, modulation, and high-  
643 level expression by vectors containing the arabinose P<sub>BAD</sub> promoter. *J Bacteriol*  
644 177(14):4121-4130.
- 645 Hagan CL, Silhavy TJ, Kahne D (2011)  $\beta$ -barrel membrane protein assembly by the Bam  
646 complex. *Annu Rev Biochem* 80:189-210.

- 647 Hawrot E, Kennedy EP (1978) Phospholipid composition and membrane function in  
648 phosphatidylserine decarboxylase mutants of *Escherichia coli*. *J Biol Chem* 253(22):8213-  
649 8220.
- 650 Jacquier N, Frandi A, Viollier PH, Greub G (2015) Disassembly of a medial transenvelope  
651 structure by antibiotics during intracellular division. *Chem Biol* 22(9):1217-1227.
- 652 Jones NC, Osborn MJ (1977) Translocation of phospholipids between the outer and inner  
653 membranes of *Salmonella typhimurium*. *J Biol Chem* 252(20):7405-7412.
- 654 Kanemasa Y, Akamatsu Y, Nojima S (1967) Composition and turnover of the phospholipids in  
655 *Escherichia coli*. *Biochim Biophys Acta* 144(2):382-390.
- 656 Kanfer J, Kennedy EP (1963) Metabolism and function of bacterial lipids I. Metabolism of  
657 phospholipids in *Escherichia coli* B. *J Biol Chem* 238(9):2919-2922.
- 658 Khetrpal V, et al. (2015) A set of powerful negative selection systems for unmodified  
659 Enterobacteriaceae. *Nucleic Acids Res* 43:e83.
- 660 Laemmli UK (1970) Cleavage of structural proteins during the assembly of the head of  
661 bacteriophage T4. *Nature* 227(5259):680-685.
- 662 Langley KE, Hawrot E, Kennedy EP (1982) Membrane assembly: movement of  
663 phosphatidylserine between the cytoplasmic and outer membranes of *Escherichia coli*. *J*  
664 *Bacteriol* 152(3):1033-1041.
- 665 Lazzaroni JC, Portalier RC (1981) Genetic and biochemical characterization of periplasmic-  
666 leaky mutants of *Escherichia coli* K-12. *J Bacteriol* 145(3):1351-1358.
- 667 Lloubes R, et al. (2001) The Tol-Pal proteins of the *Escherichia coli* cell envelope: an energized  
668 system required for outer membrane integrity? *Res Microbiol* 152(6):523-529.
- 669 Lo Sciuto A, et al. (2014) The periplasmic protein TolB as a potential drug target in  
670 *Pseudomonas aeruginosa*. *PLoS One* 9:e103784.

- 671 Malinverni JC, Silhavy TJ (2009) An ABC transport system that maintains lipid asymmetry in  
672 the Gram-negative outer membrane. *Proc Natl Acad Sci USA* 106(19):8009-8014.
- 673 McMahon HT, Gallop JL (2005) Membrane curvature and mechanisms of dynamic cell  
674 membrane remodelling. *Nature* 438(7068):590-596.
- 675 Nikaido H (2003) Molecular basis of bacterial outer membrane permeability revisited. *Microbiol*  
676 *Mol Biol Rev* 67(4):593-656.
- 677 Okuda S, Sherman DJ, Silhavy TJ, Ruiz N, Kahne D (2016) Lipopolysaccharide transport and  
678 assembly at the outer membrane: the PEZ model. *Nat Rev Microbiol* 14:337-345.
- 679 Okuda S, Tokuda H (2011) Lipoprotein sorting in bacteria. *Annu Rev Microbiol* 65:239-259.
- 680 Pitre A, Pan Y, Pruett S, Skalli O (2007) On the use of ratio standard curves to accurately  
681 quantitate relative changes in protein levels by western blot. *Anal Biochem* 361(2):305-307.
- 682 Ruiz N, Chng SS, Hinikera A, Kahne D, Silhavy TJ (2010) Nonconsecutive disulphide bond  
683 formation in an essential integral outer membrane protein. *Proc Natl Acad Sci USA*  
684 107(27):12245-12250.
- 685 Ruiz N, Falcone B, Kahne D, Silhavy TJ (2005) Chemical conditionality: a genetic strategy to  
686 probe organelle assembly. *Cell* 121:307-317.
- 687 Ruiz N, Gronenberg LS, Kahne D, Silhavy TJ (2008) Identification of two inner-membrane  
688 proteins required for the transport of lipopolysaccharide to the outer membrane of *Escherichia*  
689 *coli*. *Proc Natl Acad Sci USA* 105(14):5537-5542.
- 690 Satre M, Kennedy EP (1978) Identification of bound pyruvate essential for the activity of  
691 phosphatidylserine decarboxylase of *Escherichia coli*. *J Biol Chem* 253(2):479-483.
- 692 Sheetz MP, Singer SJ (1974) Biological membranes as bilayer couples. A molecular mechanism  
693 of drug-erythrocyte interactions. *Proc Natl Acad Sci USA* 71(11):4457-4461.



- 694 Silhavy TJ, Berman ML, Enquist LW (1984) *Experiments with Gene fusions* (Cold Spring  
695 Harbor Laboratory Press, Cold Spring Harbor, New York).
- 696 Sturgis JN (2001) Organisation and evolution of the *tol-pal* gene cluster. *J Mol Microbiol*  
697 *Biotechnol* 3(1):113-122.
- 698 Thong S, et al. (2016) Defining key roles for auxillary proteins in an ABC transporter that  
699 maintains bacterial outer membrane lipid asymmetry. *eLife* 5:e19042.
- 700 Thormann KM, Paulick A (2010) Tuning the flagellar motor. *Microbiology* 156(Pt 5):1275-  
701 1283.
- 702 Vines ED, Marolda CL, Balachandran A, Valvano MA (2005) Defective O-antigen  
703 polymerization in *tolA* and *pal* mutants of *Escherichia coli* in response to extracytoplasmic  
704 stress. *J Bacteriol* 187(10):3359-3368.
- 705 Walburger A, Lazdunski C, Corda Y (2002) The Tol/Pal system function requires an interaction  
706 between the C-terminal domain of TolA and the N-terminal domain of TolB. *Mol Microbiol*  
707 44(3):695-708.
- 708 Witty M, et al. (2002) Structure of the periplasmic domain of *Pseudomonas aeruginosa* TolA:  
709 evidence for an evolutionary relationship with the TonB transporter protein. *EMBO J*  
710 21(16):4207-4218.
- 711 Wu T, et al. (2005) Identification of a multicomponent complex required for outer membrane  
712 biogenesis in *Escherichia coli*. *Cell* 121:235-245.
- 713 Wu T, et al. (2006) Identification of a protein complex that assembles lipopolysaccharide in the  
714 outer membrane of *Escherichia coli*. *Proc Natl Acad Sci USA* 103(31):11754-11759.
- 715 Yeh YC, Comolli LR, Downing KH, Shapiro L, McAdams HH (2010) The *Caulobacter* Tol-Pal  
716 complex is essential for outer membrane integrity and the positioning of a polar localization  
717 factor. *J Bacteriol* 192(19):4847-4858.

- 718 Yem DW, Wu HC (1978) Physiological characterization of an *Escherichia coli* mutant altered in  
719 the structure of murein lipoprotein. *J Bacteriol* 133(3):1419-1426.
- 720 Yokoto K, Kito M (1982) Transfer of the phosphatidyl moiety of phosphatidylglycerol to  
721 phosphatidylethanolamine in *Escherichia coli*. *J Bacteriol* 151(2):952-961.
- 722 Zhou Z, Lin S, Cotter RJ, Raetz CRH (1999) Lipid A modifications characteristic of *Salmonella*  
723 *typhimurium* are induced by  $\text{NH}_4\text{VO}_3$  in *Escherichia coli* K-12. *J Biol Chem* 274(26):18503-  
724 18514.
- 725

726 **Figures**

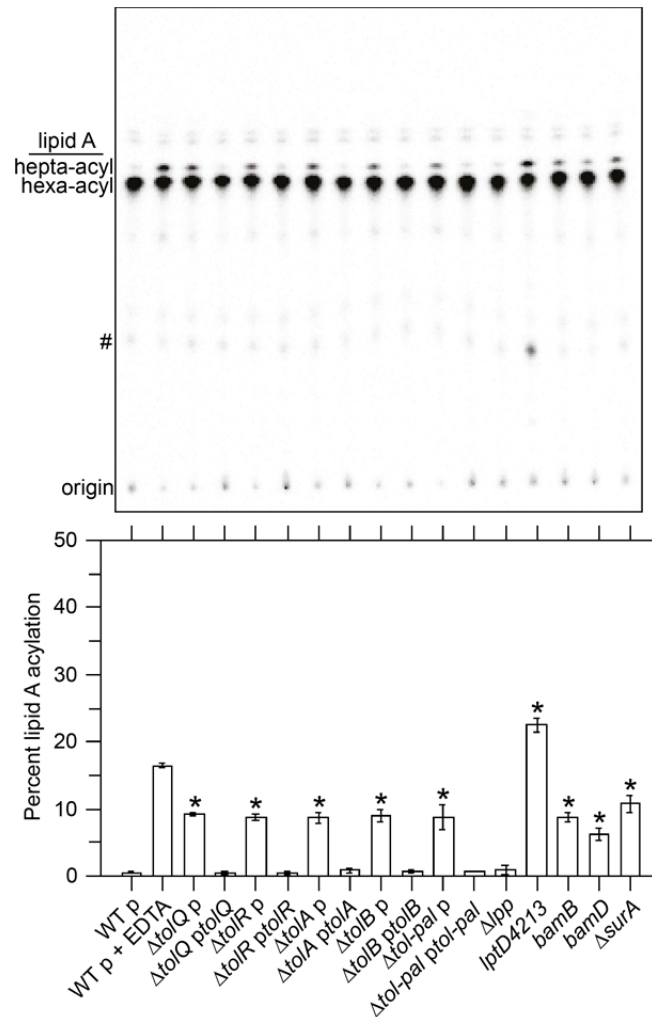

727

728 **Figure 1** Cells lacking the Tol-Pal complex accumulate PLs in the outer leaflet of the OM as  
729 judged by lipid A acylation. Thin layer chromatographic (TLC) analysis of [<sup>32</sup>P]-labelled lipid A  
730 extracted from WT,  $\Delta tol-pal$ , and various mutant strains (*see text*). Where indicated, WT and *tol-*  
731 *pal* mutants contain an empty pET23/42 plasmid (p) (Wu et al., 2006) or one expressing the  
732 corresponding *tol-pal* gene(s) at low levels (e.g. *ptol-pal*). As a positive control for lipid A  
733 acylation, WT cells were treated with EDTA (to chelate Mg<sup>2+</sup> and destabilize the LPS layer)  
734 prior to extraction. Equal amounts of radioactivity were spotted for each sample. Lipid spots  
735 annotated # represent 1-pyrophosphoryl-lipid A. Average percentages of lipid A acylation and

736 standard deviations were quantified from triplicate experiments and plotted below. Student's t-  
737 tests: \*  $p < 0.005$  as compared to WT.

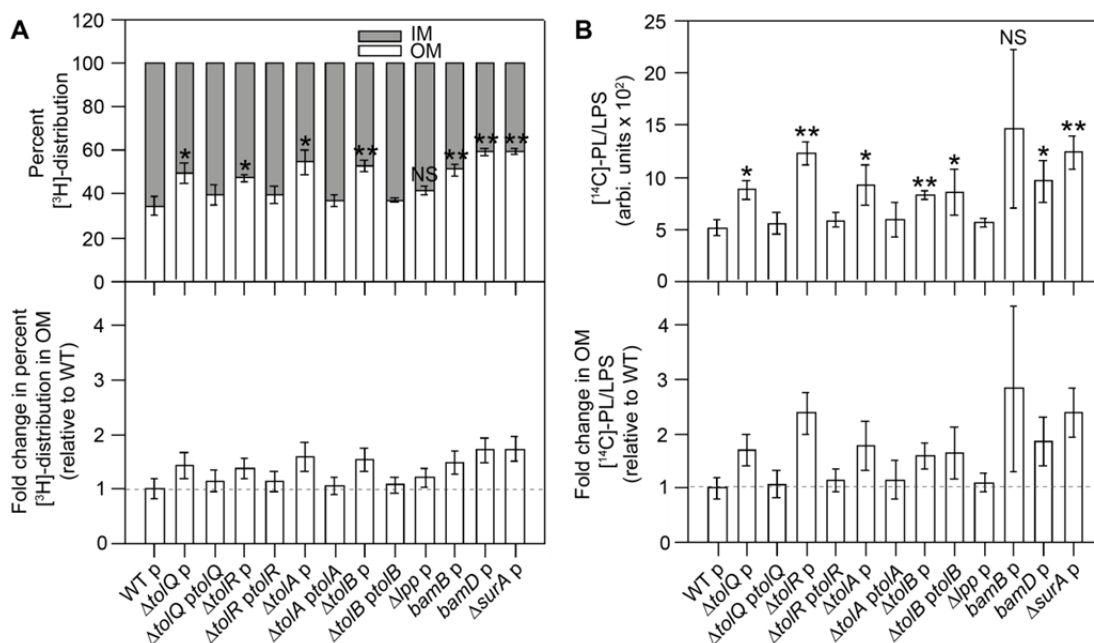

738

739 **Figure 2** Cells lacking the Tol-Pal complex accumulate excess PLs (relative to LPS) in the OM.

740 (A) Steady-state distribution of [<sup>3</sup>H]-glycerol labelled PLs between the IM and the OM of WT,

741  $\Delta$ tol-pal, and various mutant strains (upper panel)(Figure 2 - figure supplement 2). Distribution

742 of [<sup>3</sup>H]-labelled PLs in the OMs of respective mutants expressed as fold changes relative to the

743 WT OM (lower panel). The IMs and OMs from both WT and tol-pal mutants were separated

744 with equal efficiencies during sucrose density gradient fractionation (Figure 2 - figure

745 supplement 1). (B) Steady-state PL:LPS ratios in the OMs of WT,  $\Delta$ tol-pal, and various mutant

746 strains (upper panel). Lipids were labelled with [<sup>14</sup>C]-acetate and differentially extracted from

747 OMs (Figure 2 - figure supplement 3). OM PL:LPS ratios of respective mutants expressed as

748 fold changes relative to that in the WT OM (lower panel). Error bars represent standard

749 deviations calculated from triplicate experiments. Student's t-tests: \*  $p < 0.05$ ; \*\*  $p < 0.005$ ; NS,

750 not significant (as compared to WT).

751

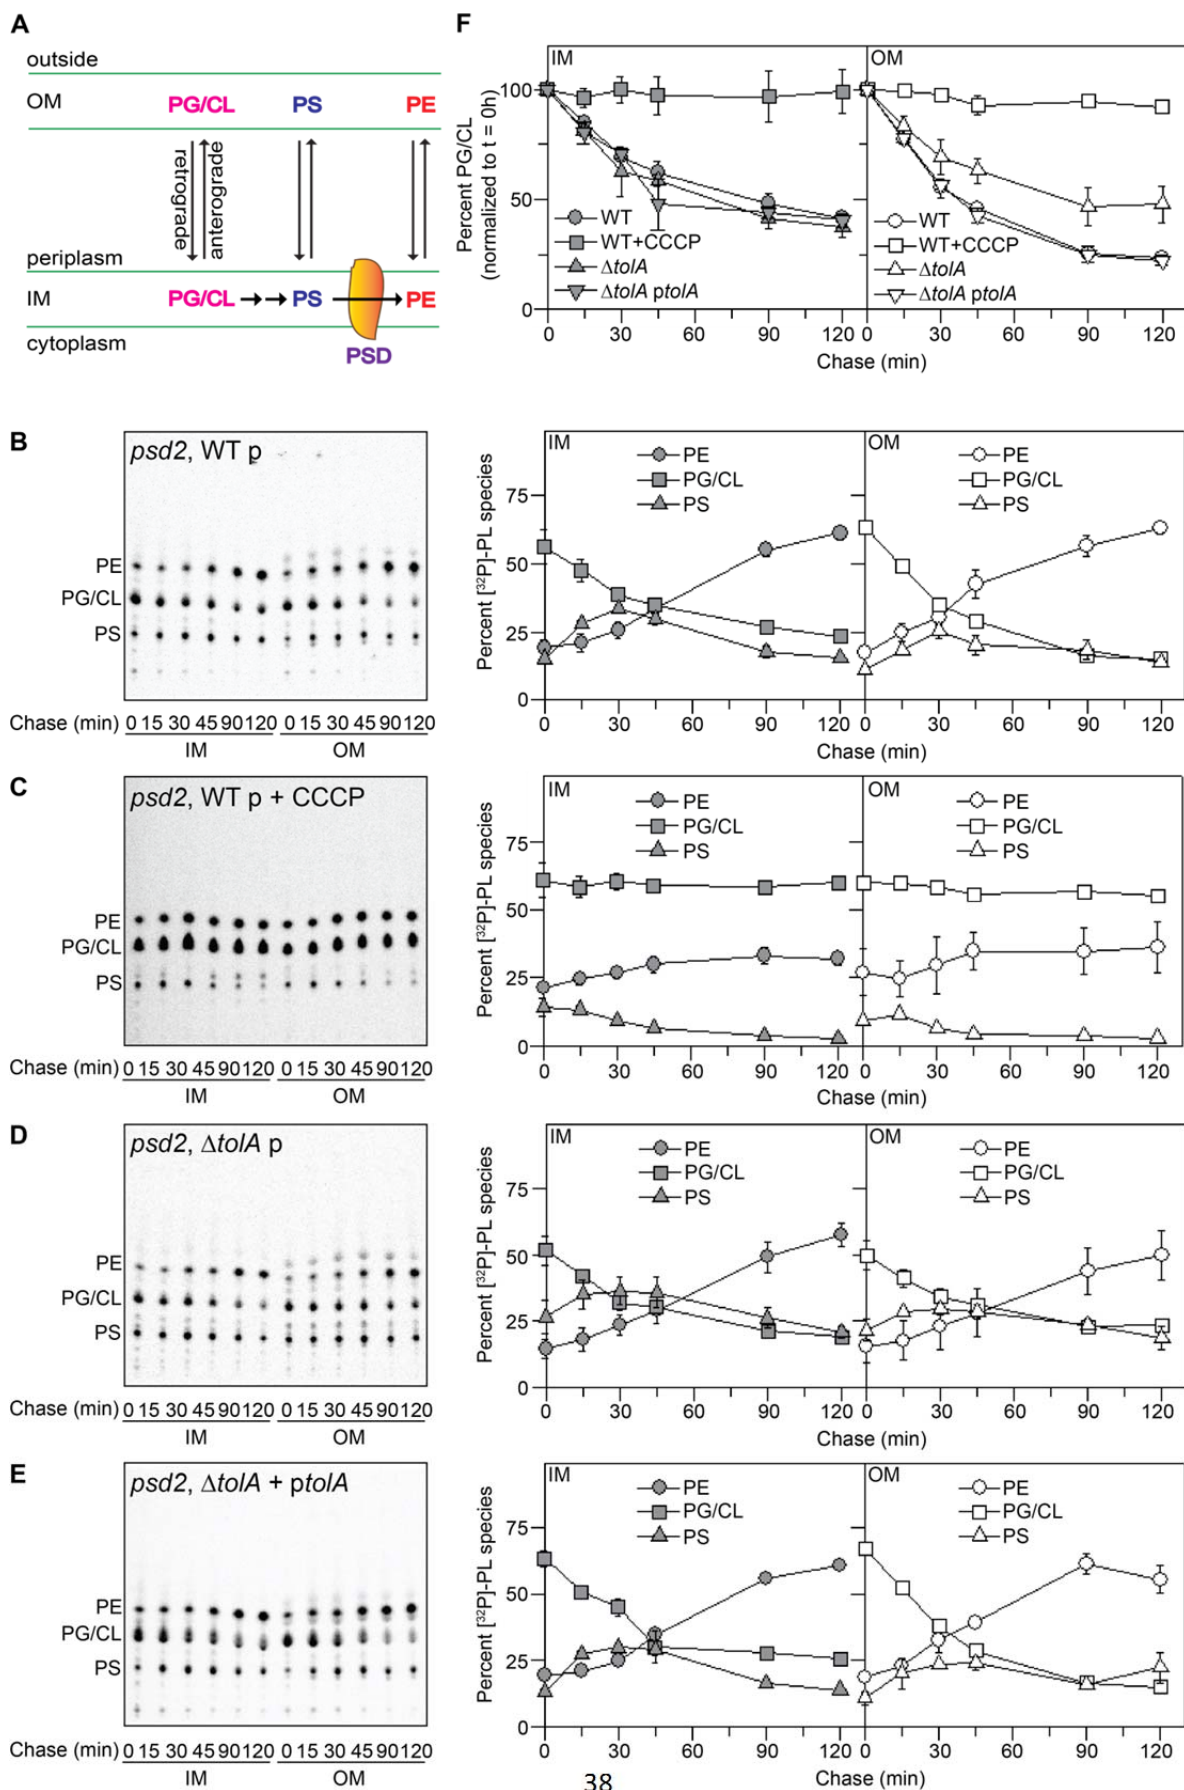

753 **Figure 3** Cells lacking the Tol-Pal complex are defective in OM PG/CL turnover. **(A)** A  
754 schematic diagram depicting movement and turnover of PE, PG and CL (major), and PS (trace)  
755 in the cell envelope. **(B-E)** TLC time-course analyses of [<sup>32</sup>P]-pulse-labelled PLs extracted from  
756 the IMs and OMs of **(B)** WT, **(C)** WT (with CCCP added), **(D)**  $\Delta tolA$ , and **(E)** *tolA*-  
757 complemented strains also harboring the *psd2* mutation. The average percentage levels of PE,  
758 PG/CL, and PS in the IM and OM at each time point, together with standard deviations, were  
759 quantified from triplicate experiments and shown on the right. **(F)** The percentage levels of  
760 PG/CL in the IMs and OMs from **(B-E)** normalized to the corresponding levels at the start of the  
761 chase (0 min).  
762

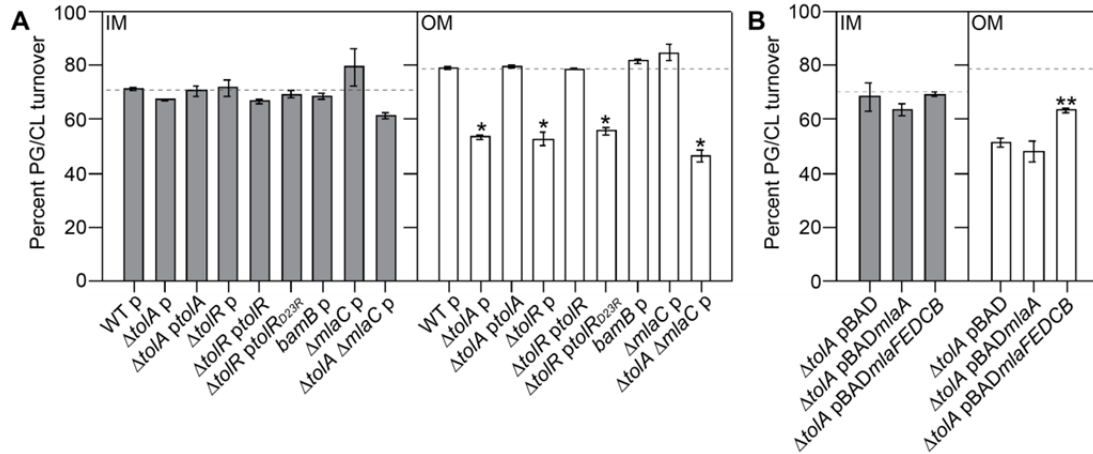

763

764 **Figure 4** Tol-Pal function is required for efficient retrograde PG/CL transport, as judged by OM

765 PG/CL turnover rates. Single time-point (2-h chase) quantification of the turnover rate of [<sup>32</sup>P]-

766 labelled PG/CL in the IMs and OM of (A) WT, *tol-pal* and various mutant strains, and (B)

767  $\Delta tolA$  overexpressing OmpC-Mla components, all in the *psd2* background (*see text*) (Figure 4-

768 figure supplement 1). Percentage PG/CL turnover at 2-h is expressed as  $[(\%PG/CL)_{start} -$

769  $(\%PG/CL)_{2h}]/[(\%PG/CL)_{start}]$ . Average percentage lipid levels and standard deviations were

770 quantified from triplicate experiments. Student's t-tests: \*  $p < 0.0005$  as compared to WT; \*\*  $p <$

771  $0.0005$  as compared to  $\Delta tolA$ .

772



773 **Figure supplements**

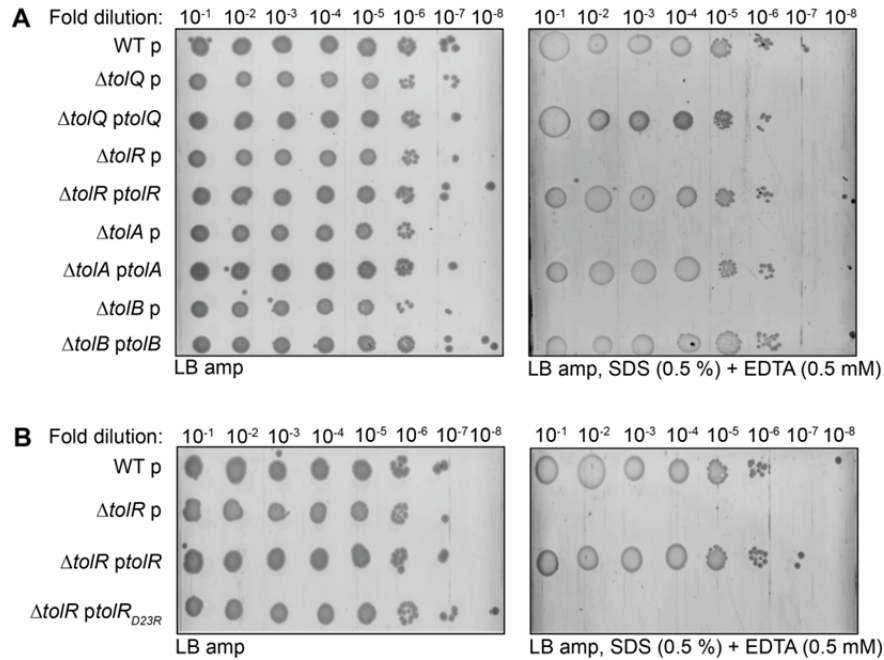

774

775 **Figure 1 - figure supplement 1** SDS/EDTA sensitivity in *tol-pal* strains can be rescued only by  
776 expressing the corresponding functional *tol-pal* gene(s) from the pET23/42 plasmid (Wu et al.,  
777 2006). Serial dilutions of cultures of wild-type (WT) and indicated *tol-pal* strains harboring  
778 pET23/42 empty vector (p), or pET23/42 encoding **(A)** functional or **(B)** non-functional *tol-pal*  
779 gene(s) (e.g. *ptolA*), were spotted on LB agar plates containing 125 μg ml<sup>-1</sup> ampicillin,  
780 supplemented with or without SDS (0.5%) and EDTA (0.5 mM) as indicated, and incubated  
781 overnight at 37°C. In the plasmids used, the *tol-pal* gene(s) is placed under the control of the T7  
782 promoter, which is transcribed at low levels by endogenous polymerases. *tolR*<sub>D23R</sub> is a non-  
783 functional allele encoding TolR protein that is defective in transducing energy derived from the  
784 pmf (Cascales et al., 2001).

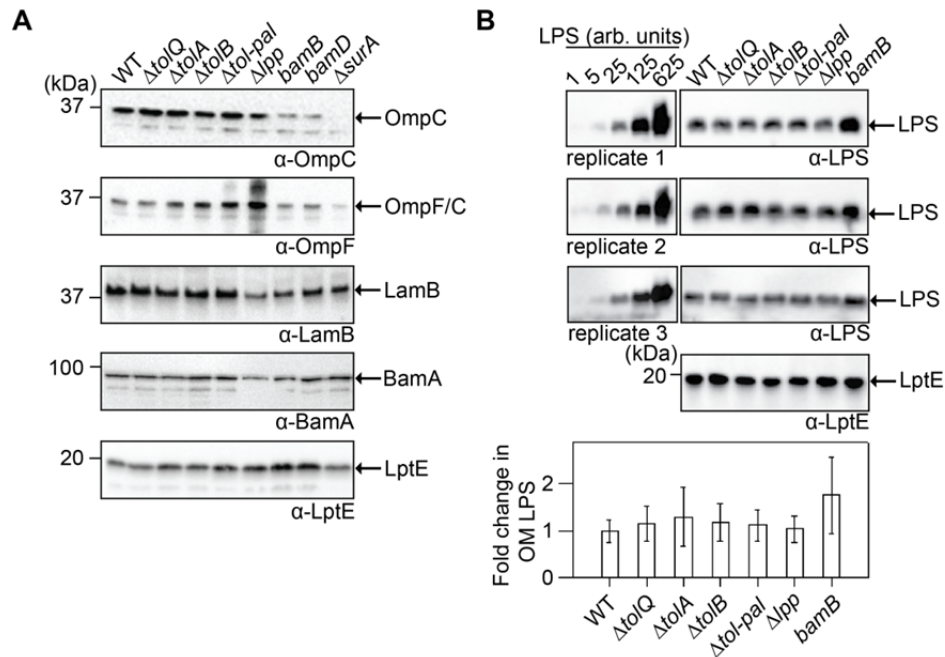

785

786 **Figure 1 - figure supplement 2** *tol-pal* mutations do not affect  $\beta$ -barrel OMP and LPS

787 assembly. Immunoblot analyses of (A) indicated OMPs and (B) LPS in the OMVs of WT and *tol-*

788 *pal* strains. Equal amounts of OMVs (based on protein content) were resolved on SDS-PAGE prior

789 to immunoblotting. The OMP assembly mutants (*bamB*, *bamD*,  $\Delta surA$ ) serve as controls for

790 decreased OMP levels, and the levels of LptE serve as a loading control.  $\alpha$ -LPS immunoblots

791 were repeated three times for the same OMV samples as shown. Serial dilutions of WT OMVs were

792 run as standards and immunoblotted alongside the indicated samples, and LPS levels in these

793 samples were quantified using ratio standard curves generated from the standards (Pitre et al.,

794 2007). The relative levels of LPS in each OMV was normalized to the WT OMV, and averaged

795 across all three technical replicates. Error bars represent standard deviations.

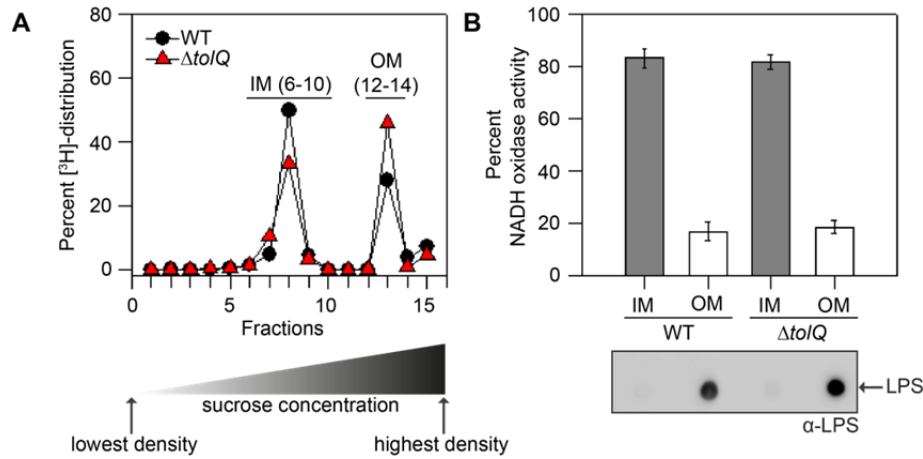

796

797 **Figure 2 - figure supplement 1** Inner and outer membranes of both WT and *tol-pal* strains are

798 effectively separated via fractionation on sucrose density gradients. **(A)** [<sup>3</sup>H]-distribution profiles

799 of WT (*black circles*) and  $\Delta tolQ$  mutant (*red triangles*) cell lysates fractionated on a sucrose

800 density gradient. Cells were grown in the presence of [2-<sup>3</sup>H]-glycerol to specifically label PLs in

801 the IM and OMs. **(B)** Percent NADH oxidase activity (*upper panel*) and LPS levels (*lower*

802 *panel*) (dot blot) in pooled IM and OM fractions from **(A)**.

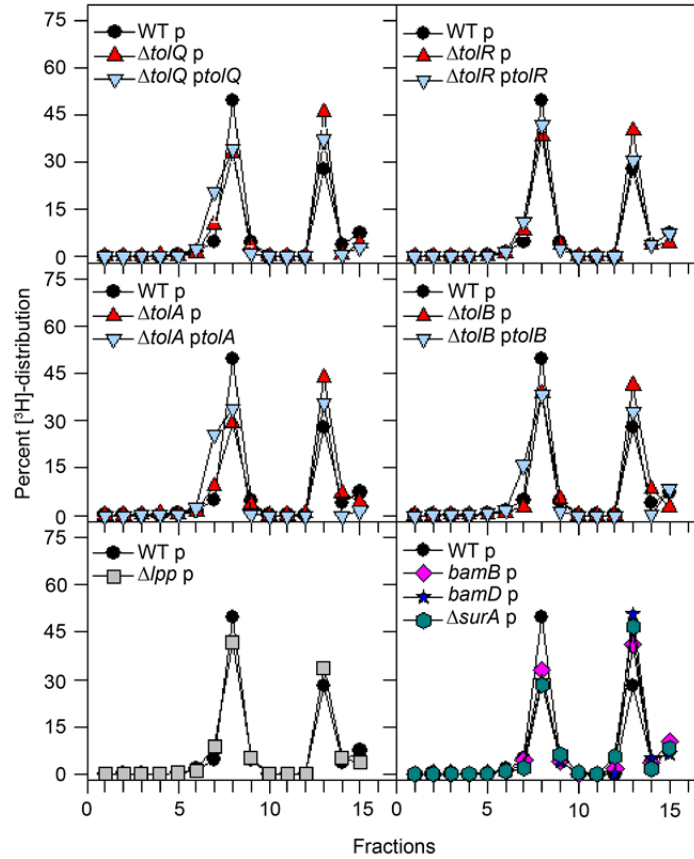

803

804 **Figure 2 - figure supplement 2** Cells lacking the Tol-Pal complex contain more PLs in the OM,

805 compared to the IM. Representative [<sup>3</sup>H]-distribution profiles of cell lysates from WT (*black*

806 *circles*), *tol-pal* mutants (*red triangles*), *tol-pal*-complemented strains (*blue inverted triangles*),

807 and various control strains, fractionated on sucrose density gradients. Cells were grown in the

808 presence of [2-<sup>3</sup>H]-glycerol to specifically label PLs in the IMs and OMs. Total [<sup>3</sup>H]-activities

809 detected in IM (6-10) and OM (12-14) fractions were expressed as a percentage of their sums,

810 averaged across three replicate experiments, and plotted in Figure 2A.

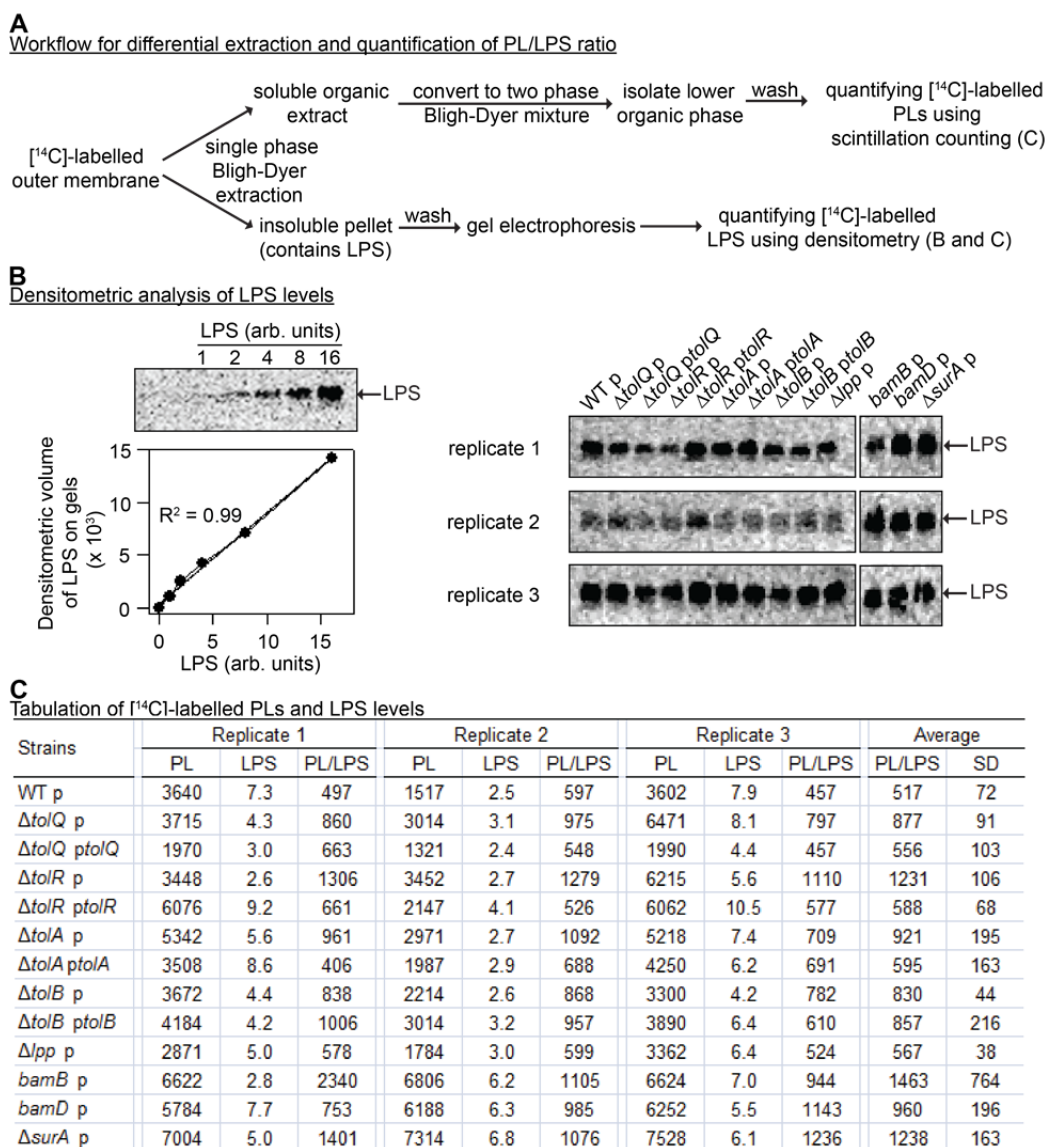

811

812 **Figure 2 - figure supplement 3** Cells lacking the Tol-Pal complex accumulate excess PLs  
813 (relative to LPS) in the OM. (A) Workflow for differential extraction and subsequent  
814 quantification of PLs and LPS levels in the  $^{14}\text{C}$ -acetate labelled OMs. (B) In-gel quantification  
815 of  $^{14}\text{C}$ -LPS levels in the OMs of WT, *tol-pal* mutants, *tol-pal*-complemented strains, and  
816 various control strains.  $^{14}\text{C}$ -LPS of respective strains separated on SDS-PAGE gels (right) were  
817 visualized by phosphor imaging and quantified via densitometry using a linear standard curve  
818 (left). (C) Tabulation of  $^{14}\text{C}$ -labelled PL levels (scintillation counts), LPS levels (gel

819 densitometry), and arbitrary PL/LPS ratios in the OMs of the indicated strains. The average  
820 PL/LPS ratio for each strain was obtained from three independent experiments, and plotted in  
821 Figure 2B.

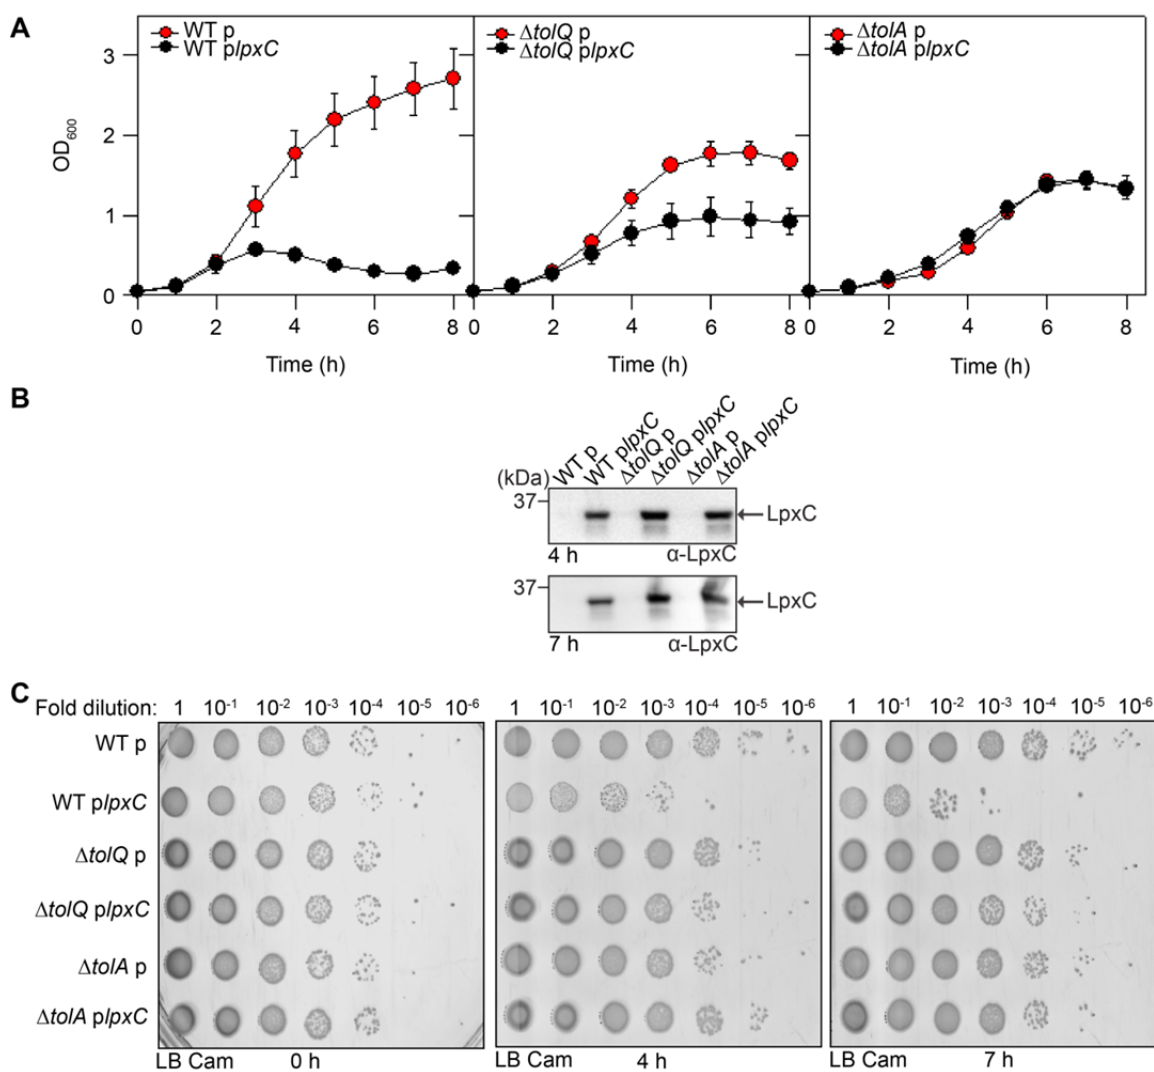

822

823 **Figure 2 - figure supplement 4** *tol-pal* mutants survive toxicity induced by overproduction of  
 824 LpxC, the enzyme catalyzing the first committed step in LPS biosynthesis. (A) Growth profiles  
 825 of WT,  $\Delta tolQ$  and  $\Delta tolA$  cells harboring either pBAD18cm empty vector (p) or pBAD18cm*lpxC*  
 826 (*lpxC*) and grown in the presence of arabinose (0.2%). OD<sub>600</sub> values were measured every hour  
 827 during growth. Error bars represent the standard deviation observed from triplicate experiments.  
 828 (B) Immunoblot analyses of LpxC in the respective strains from 4-h and 7-h cultures in (A),  
 829 indicating comparable levels of LpxC overexpression in these strains. (C) Indicated serial

830 dilutions of 0-, 4- and 7-h cultures of the same strains in (A) were spotted on LB agar plates  
831 containing  $30 \mu\text{g ml}^{-1}$  cam and incubated overnight at  $37^\circ\text{C}$ .



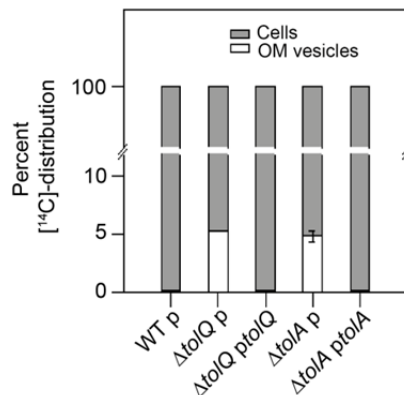

832

833 **Figure 2 - figure supplement 5** Cells lacking the Tol-Pal complex release OM vesicles

834 amounting to ~5% of total cellular membrane material. Average steady-state distribution of

835 [<sup>14</sup>C]-lipids found associated with cells (total membranes) or OM vesicles for WT, *tol-pal*

836 mutants and complemented strains. Error bars represent the standard deviation calculated from

837 triplicate experiments.

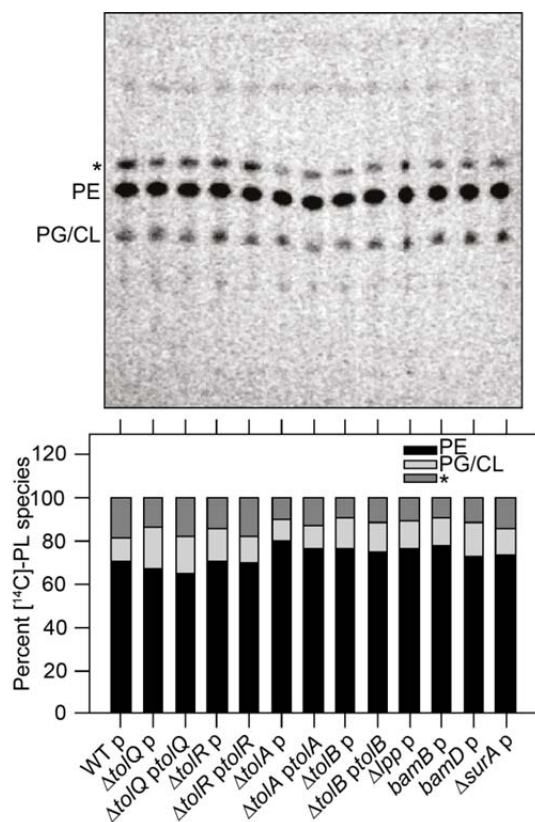

838

839 **Figure 2 - figure supplement 6** Although cells lacking the Tol-Pal complex accumulate ~50%  
840 more PLs in the OM, PL compositions of this membrane are comparable to that in WT cells.  
841 TLC analysis of [<sup>14</sup>C]-labelled PLs extracted from the OMs of WT and indicated mutant strains.  
842 Equal amounts of radioactivity were spotted for each sample. An unidentified lipid species that  
843 migrated in this solvent system similarly to palmitoylated PG (Dalebroux et al., 2014) is  
844 annotated by an asterisk (\*). The percentage levels of PE, PG/CL, and the unidentified lipid were  
845 quantified and shown below.

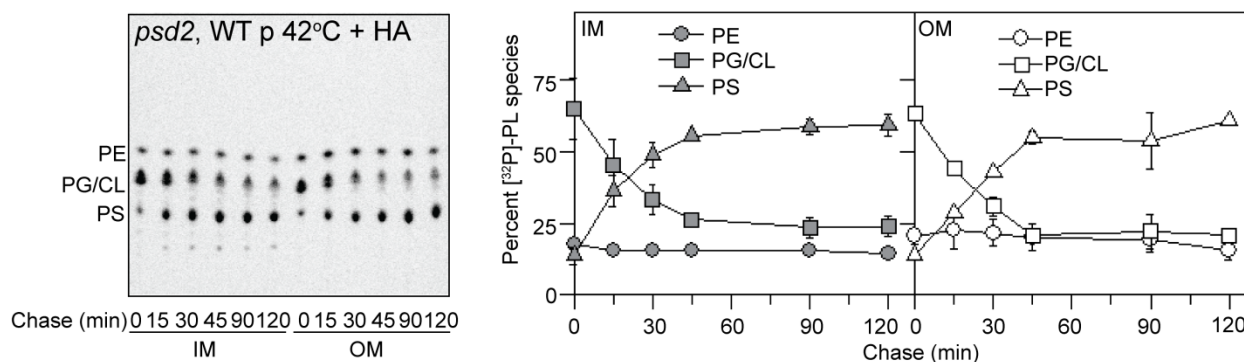

846

847 **Figure 3 - figure supplement 1** PG/CL is converted to PS in the absence of PSD function. TLC

848 time-course analyses of [<sup>32</sup>P]-pulse-labelled PLs extracted from the IMs and OMs of the WT

849 strain also harboring the temperature-sensitive *psd2* mutation. Cells were incubated at the

850 restrictive temperature (42°C, 4 h) and PLs were pulse-labelled with [<sup>32</sup>P]-phosphate during the

851 last 30 min at the restrictive temperature, and then chased in the presence of excess cold

852 phosphate and hydroxylamine (HA; 10 mM) at the same temperature. HA is a known PSD

853 inhibitor (Satre and Kennedy, 1978). The percentage levels of PE (circles), PG/CL (squares), and

854 PS (triangles) in the IM (grey symbols) and OM (white symbols) at each time point were

855 quantified and shown on the right. The results clearly showed quantitative PG/CL to PS

856 conversion.

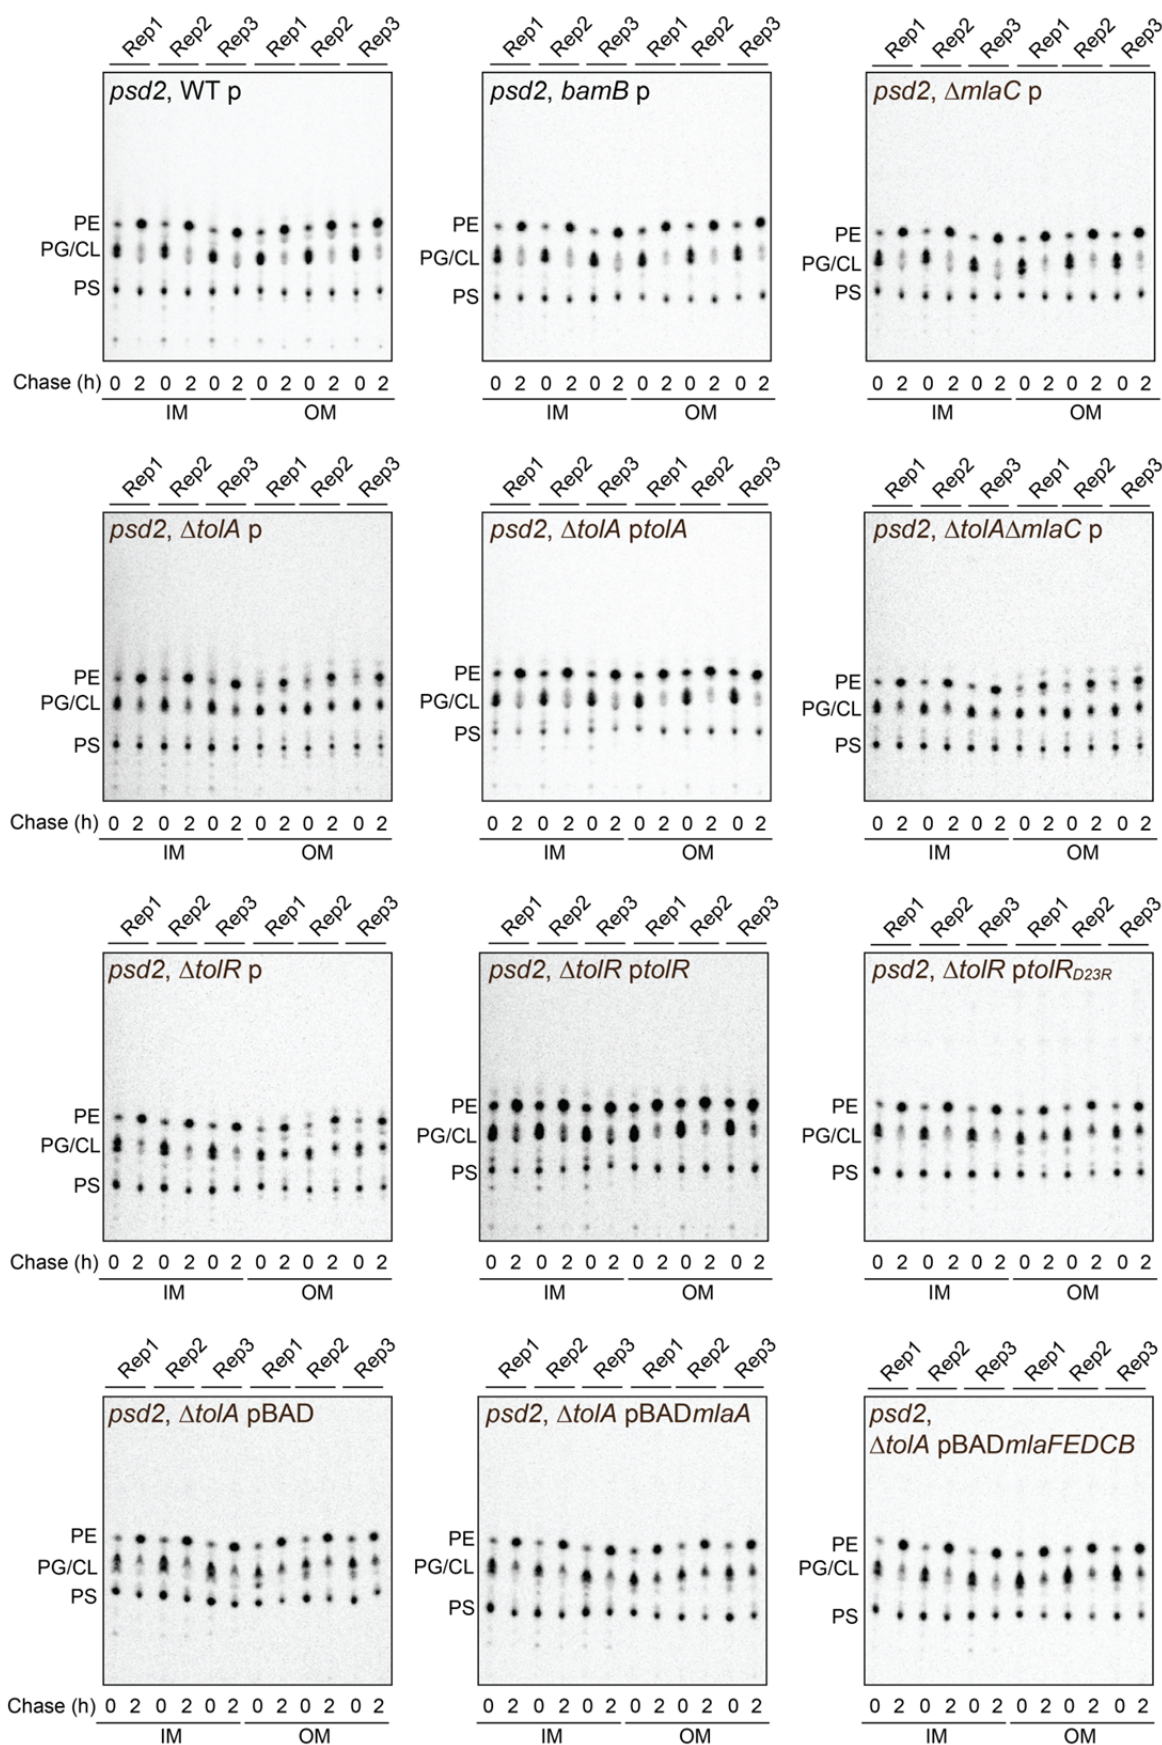

858 **Figure 4 - figure supplement 1** Cells lacking the Tol-Pal complex are defective in OM PG/CL  
859 turnover. Single time-point TLC analyses of [<sup>32</sup>P]-pulse-labelled PLs extracted from the IMs and  
860 OMs of indicated strains also harboring the temperature-sensitive *psd2* mutation. Cells were  
861 incubated at the restrictive temperature (42°C, 4 h) and PLs were pulse-labelled with [<sup>32</sup>P]-  
862 phosphate during the last 30 min at the restrictive temperature, and then chased in the presence  
863 of excess cold phosphate at the permissive temperature (30°C) for 2 h. The average extents of  
864 PG/CL turnover ( $[(\%PG/CL)_{start} - (\%PG/CL)_{2h}] / [(\%PG/CL)_{start}]$ ) in the IM and OM for each  
865 strain was obtained from three biological replicate (Reps) experiments, and plotted in Figure 4.  
866

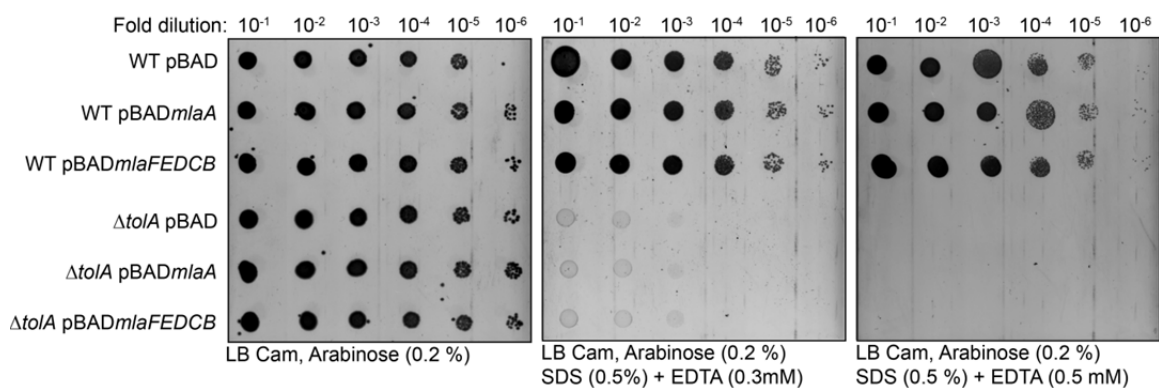

867  
868 **Figure 4 - figure supplement 2** Overexpression of OmpC-Mla components does not rescue  
869 SDS/EDTA sensitivity of the  $\Delta tolA$  mutant. Serial dilutions of cultures of wild-type (WT) and  
870 the  $\Delta tolA$  mutant strain (both in the *psd2* background) harboring pBAD33 empty vector (pBAD)  
871 or pBAD33 encoding indicated components of the OmpC-Mla system, were spotted on LB agar  
872 plates containing chloramphenicol (30  $\mu\text{g ml}^{-1}$ ) and arabinose (0.2 %), supplemented with or  
873 without SDS (0.5%) and EDTA (0.3/0.5 mM) as labeled, and incubated overnight at the  
874 permissive temperature (30°C).

875

876 **Supplementary File 1**

877 **Supplementary File 1A. Bacterial strains used in this study.**

| Strains  | Relevant genotype                                                                                                   | References                |
|----------|---------------------------------------------------------------------------------------------------------------------|---------------------------|
| MC4100   | <i>[F araD139 Δ(argF-lac) U169 rpsL150 relA1 flbB5301 ptsF25 deoC1 ptsF25 thi]</i>                                  | Casadaban, 1976           |
| BW25113  | <i>F- Δ(araD-araB)567 ΔlacZ4787::rrnB-3 λ- rph-1 Δ(rhaDrhaB)568 hsdR514 endA1 hsdR17 (rK12- mK12+) supE44 thi-1</i> | Datsenko and Wanner, 2000 |
| NovaBlue | <i>recA1 gyrA96 relA1 lac F' [proA+B+lacIqZΔM15::Tn10]</i>                                                          | Novagen                   |
| NR754    | MC4100 <i>araD</i> <sup>+</sup>                                                                                     | Ruiz et al., 2008         |
| EH150    | <i>psd-2 purA</i> <sup>+</sup> ; temperature-sensitive PSD                                                          | Hawrot and Kennedy, 1978  |
| NR1215   | NR754 <i>ΔsurA</i>                                                                                                  | Ruiz et al., 2010         |
| NR698    | MC4100 <i>lptD4213 (carB</i> <sup>+</sup> , <i>Tn10)</i>                                                            | Ruiz et al., 2005         |
| NR814    | MC4100 <i>bamD::kan</i>                                                                                             | Wu et al., 2005           |
| NR721    | MC4100 <i>bamB::kan</i>                                                                                             | Ruiz et al., 2005         |
| RS101    | BW25113 <i>ΔtolQ::kan</i>                                                                                           | This study                |
| JW0728   | BW25113 <i>ΔtolR::kan</i>                                                                                           | Baba et al., 2006         |
| RS102    | BW25113 <i>ΔtolA::kan</i>                                                                                           | This study                |
| JW5100   | BW25113 <i>ΔtolB::kan</i>                                                                                           | Baba et al., 2006         |
| RS104    | BW25113 <i>Δtol-pal::kan</i>                                                                                        | This study                |
| RS105    | BW25113 <i>Δlpp::kan</i>                                                                                            | This study                |
| RS119    | MC4100 <i>ΔtolQ::kan</i>                                                                                            | This study                |
| RS120    | MC4100 <i>ΔtolR::kan</i>                                                                                            | This study                |
| RS121    | MC4100 <i>ΔtolA::kan</i>                                                                                            | This study                |
| RS122    | MC4100 <i>ΔtolB::kan</i>                                                                                            | This study                |
| RS125    | MC4100 <i>Δtol-pal::kan</i>                                                                                         | This study                |
| RS137    | MC4100 <i>Δlpp::kan</i>                                                                                             | This study                |
| CZS011   | MC4100 <i>ΔmlaC::kan</i>                                                                                            | Lab collection            |
| RS173    | EH150 <i>ΔtolR::kan</i>                                                                                             | This study                |
| RS174    | EH150 <i>ΔtolA::kan</i>                                                                                             | This study                |
| RS177    | EH150 <i>bamB::kan</i>                                                                                              | This study                |
| RS178    | EH150 <i>ΔmlaC::kan</i>                                                                                             | This study                |
| RS180    | EH150 <i>ΔtolA ΔmlaC::kan</i>                                                                                       | This study                |
| JXE082   | NR754 <i>ΔtolQ::kan</i>                                                                                             | This study                |
| JXE081   | NR754 <i>ΔtolA::kan</i>                                                                                             | This study                |

878 **Supplementary File 1B. Plasmids used in this study.**

| Plasmids                            | Description                                                                                                                      | Plasmid construction      |                                 | References          |
|-------------------------------------|----------------------------------------------------------------------------------------------------------------------------------|---------------------------|---------------------------------|---------------------|
|                                     |                                                                                                                                  | PCR template <sup>a</sup> | PCR primers <sup>b</sup>        |                     |
| pET23/42                            | P <sub>T7</sub> inducible expression vector, contains multiple cloning site of pET42a(+) in pET23a(+) backbone; Amp <sup>R</sup> | -                         | -                               | Wu et al., 2006     |
| pBAD18cm                            | P <sub>BAD</sub> inducible expression vector; Cam <sup>R</sup>                                                                   | -                         | -                               | Guzman et al., 1995 |
| pBAD33                              | P <sub>BAD</sub> inducible expression vector; Cam <sup>R</sup>                                                                   | -                         | -                               | Guzman et al., 1995 |
| pET23/42 <i>tolQ</i>                | Encodes full length TolQ; Amp <sup>R</sup>                                                                                       | Ch. DNA                   | TolQ-N-NdeI/TolQ-C-AvrII        | This study          |
| pET23/42 <i>tolR</i>                | Encodes full length TolR; Amp <sup>R</sup>                                                                                       | Ch. DNA                   | TolR-N-NdeI/TolR-C-AvrII        | This study          |
| pET23/42 <i>tolR<sub>D23R</sub></i> | Encodes full length TolR <sub>D23R</sub> ; Amp <sup>R</sup>                                                                      | pET23/42 <i>tolR</i>      | TolR-D23R-N/TolR-D23R-C         | This study          |
| pET23/42 <i>tolA</i>                | Encodes full length TolA; Amp <sup>R</sup>                                                                                       | Ch. DNA                   | TolA-N-NdeI/TolA-C-AvrII        | This study          |
| pET23/42 <i>tolB</i>                | Encodes full length TolB; Amp <sup>R</sup>                                                                                       | Ch. DNA                   | TolB-N-NdeI/TolB-C-AvrII        | This study          |
| pET23/42 <i>tol-pal</i>             | Encodes full Tol-Pal complex; Amp <sup>R</sup>                                                                                   | Ch. DNA                   | TolQ-N-NdeI/Pal-C-AvrII         | This study          |
| pBAD18cm <i>lpxC</i>                | Encodes full length LpxC; Cam <sup>R</sup>                                                                                       | Ch. DNA                   | LpxC-N-KpnI/LpxC-C-XbaI         | This study          |
| pBAD33 <i>mlaA</i>                  | Encodes full length MlaA; Cam <sup>R</sup>                                                                                       | Ch. DNA                   | MlaA-N-KpnI/MlaA-C-XbaI         | This study          |
| pBAD33 <i>mlaFEDCB</i>              | Encodes full length MlaFEDCB; Cam <sup>R</sup>                                                                                   | Ch. DNA                   | MlaFEDCB-N-KpnI/MlaFEDCB-C-XbaI | This study          |

879 <sup>a</sup> Ch. DNA = MC4100 chromosomal DNA.

880 <sup>b</sup> Primer sequences are listed in Supplementary File 1C.



881 **Supplementary File 1C. List of oligonucleotides**

| Primer name     | Sequence (5'-3') <sup>a</sup>            |
|-----------------|------------------------------------------|
| TolQ-N-NdeI     | AGCACATATGACTGACATGAATATCC               |
| TolQ-C-AvrII    | ATTCCTAGGTTACCCCTTGTTGCTCTC              |
| TolR-N-NdeI     | ACATCATATGGCCAGAGCGCGTGGAC               |
| TolR-C-AvrII    | ACACCTAGGTTAGATAGGCTGCGTC                |
| TolA-N-NdeI     | ACATCATATGTCAAAGGCAACCGAACAAAAC          |
| TolA-C-AvrII    | ACTACCTAGGTTACGGTTTGAAGTCC               |
| TolB-N-NdeI     | GCGAATTCATATGAAGCAGGCATTACGAGTA          |
| TolB-C-AvrII    | ACTACCTAGGTCACAGATACGGCG                 |
| Pal-C-AvrII     | ACTACCTAGGTTAGTAAACCAGTACC               |
| LpxC-N-KpnI     | ATAAGGTACCTAATTTGGCGAGATAATACGATGATCAA   |
| LpxC-C-XbaI     | ATCGTCTAGATTATGCCAGTACAGCTGAAGG          |
| MlaA-N-KpnI     | ATAAGGTACCAAAAAACAGGGAGACATTTATGAAGCTTC  |
| MlaA-C-XbaI     | ATCGTCTAGATTATTCAGAATCAATATCTTTTAAAT     |
| MlaFEDCB-N-KpnI | ATAAGGTACCCGCAAGACGAAGGGTGAATTATGGAGCAGT |
| MlaFEDCB-C-XbaI | ATCGTCTAGATTAACGAGGCAGAACATCAGCAGG       |
| TolR-D23R-N     | ATTGTACCGTTGCTGAGAGTACTGCTGGTGCTG        |
| TolR-D23R-C     | CAGCACCAGCAGTACTCTCAGCAACGGTACAAT        |

882 <sup>a</sup> restriction sites are underlined.
